# Supplementary material for: SparsePro: An efficient fine-mapping method integrating summary statistics and functional annotations
Source: PLoS Genet. 2023 Dec 28;19(12):e1011104. doi: 10.1371/journal.pgen.1011104 (PMC10781022; doi:10.1371/journal.pgen.1011104)
Supplement: S6 Table — (XLSX) [file pgen.1011104.s007.xlsx]

## Sheet: Sheet1
W	Simulated_w	Annotation	Estimated_W	Standard_error
0	0	Conserved_LindbladToh	0.26	0.12
0	0	DHS_Trynka	-0.03	0.06
0	0	H3K27ac_Hnisz	0.01	0.05
0	0	H3K4me3_Trynka	-0.02	0.06
0	0	Transcr_Hoffman	-0.15	0.05
0	0	TSS_Hoffman	0.05	0.12
0	0	UTR_3_UCSC	-0.08	0.15
0	0	UTR_5_UCSC	-0.12	0.21
0	0	non_synonymous	0.32	0.22
0	0	Human_Promoter_Villar_ExAC	-0.35	0.35
1	0	Conserved_LindbladToh	0.25	0.1
1	0	DHS_Trynka	0.07	0.06
1	0	H3K27ac_Hnisz	-0.06	0.05
1	0	H3K4me3_Trynka	-0.14	0.06
1	0	Transcr_Hoffman	-0.13	0.05
1	0	TSS_Hoffman	-0.3	0.14
1	0	UTR_3_UCSC	0.22	0.12
1	0	UTR_5_UCSC	0.1	0.18
1	1	non_synonymous	1.34	0.13
1	0	Human_Promoter_Villar_ExAC	0.19	0.31
2	0	Conserved_LindbladToh	0.11	0.09
2	0	DHS_Trynka	0.03	0.06
2	0	H3K27ac_Hnisz	-0.04	0.05
2	0	H3K4me3_Trynka	-0.1	0.06
2	0	Transcr_Hoffman	-0.12	0.05
2	0	TSS_Hoffman	0.11	0.11
2	0	UTR_3_UCSC	0.16	0.12
2	0	UTR_5_UCSC	0.12	0.15
2	2	non_synonymous	2.21	0.09
2	0	Human_Promoter_Villar_ExAC	0.29	0.26
