# Supplementary material for: SparsePro: An efficient fine-mapping method integrating summary statistics and functional annotations
Source: PLoS Genet. 2023 Dec 28;19(12):e1011104. doi: 10.1371/journal.pgen.1011104 (PMC10781022; doi:10.1371/journal.pgen.1011104)
Supplement: S17 Table — (XLSX) [file pgen.1011104.s018.xlsx]

## Sheet: Sheet1
Region	Chr	Start	End	Nearest_gene	Distance_to_nearest_gene	Beta	Causal_set	PIP
chr1.1044596.1101003	chr1	1044596	1101003	C1orf159	0	-0.0093	1.1099810.C.T/1.1101003.C.T/1.1044596.A.G	0.8871/0.0123/0.0105
chr1.2146165.2201744	chr1	2146165	2201744	SKI	0	0.0108	1.2160390.C.G/1.2176126.T.A/1.2175553.C.T/1.2201744.G.T/1.2176561.C.T/1.2187911.G.A/1.2182650.G.A/1.2181748.C.T/1.2188032.A.G/1.2183056.G.A/1.2199057.C.T/1.2184855.G.C/1.2184638.C.A/1.2185310.G.C/1.2197233.C.T/1.2146165.C.A	0.4018/0.1076/0.1012/0.0551/0.0533/0.0382/0.0261/0.0259/0.0217/0.0191/0.0137/0.0131/0.013/0.0114/0.0111/0.0102
chr1.2621078.2723193	chr1	2621078	2723193	TTC34	0	0.0114	1.2723193.G.T/1.2621078.C.T/1.2630670.G.A/1.2688675.C.G	0.4854/0.2183/0.182/0.0902
chr1.7505686.7505686	chr1	7505686	7505686	CAMTA1	0	0.0097	1.7505686.G.A	0.9604
chr1.16505320.16505320	chr1	16505320	16505320	ARHGEF19	19028	0.0616	1.16505320.A.G	0.9955
chr1.16465403.16465404	chr1	16465403	16465404	EPHA2	0	-0.0104	1.16465404.C.T/1.16465403.A.G	0.5485/0.447
chr1.18783321.18793520	chr1	18783321	18793520	KLHDC7A	13904	0.011	1.18793520.A.G/1.18783560.C.T/1.18792879.A.AT/1.18783600.C.T/1.18783321.G.T/1.18783742.C.T/1.18784481.C.G	0.4385/0.1264/0.1194/0.1051/0.0947/0.0589/0.0284
chr1.23786203.23811488	chr1	23786203	23811488	ASAP3	0	0.0164	1.23799001.C.T/1.23805775.AGAG.A/1.23804917.C.T/1.23810360.T.C/1.23810658.G.A/1.23811061.C.T/1.23786203.C.T/1.23794782.G.C/1.23796004.G.A/1.23811488.T.C	0.2661/0.1733/0.1425/0.0846/0.0844/0.0641/0.0457/0.04/0.0358/0.0231
chr1.27029551.27245570	chr1	27029551	27245570	NR0B2	0	-0.0099	1.27060834.CT.C/1.27029551.G.T/1.27069021.G.T/1.27068202.C.T/1.27210721.T.C/1.27242009.G.A/1.27245570.C.CT/1.27173728.G.A/1.27164335.T.C/1.27182984.T.G	0.2586/0.1583/0.1542/0.142/0.1132/0.0439/0.0286/0.0274/0.0161/0.0144
chr1.43735694.43746459	chr1	43735694	43746459	TMEM125	0	-0.0093	1.43735694.C.CAAGCCAG/1.43735695.T.TAGCCAGG/1.43741713.G.A/1.43742228.G.A/1.43742957.A.G/1.43741224.G.A/1.43740639.C.T/1.43746459.T.G/1.43745829.C.T	0.3801/0.1798/0.1042/0.0552/0.0543/0.0518/0.0471/0.0318/0.0267
chr1.47659445.47693220	chr1	47659445	47693220	TAL1	0	-0.0093	1.47679486.G.A/1.47679366.A.T/1.47679258.C.T/1.47661868.C.G/1.47693220.A.G/1.47681761.G.A/1.47680527.G.A/1.47659445.T.C/1.47680978.T.C/1.47675536.G.C/1.47677015.C.T/1.47676525.C.A/1.47672289.A.T	0.1686/0.1514/0.1462/0.0956/0.0904/0.0522/0.0504/0.0495/0.0383/0.0226/0.0212/0.0179/0.0128
chr1.50968097.51115173	chr1	50968097	51115173	FAF1	0	-0.0115	1.51066797.A.ATG/1.51080191.G.GTAA/1.51111506.G.GA/1.51087836.C.CA/1.50984962.C.T/1.51016603.G.A/1.50968097.T.A/1.51029387.T.C/1.51058495.T.A/1.50978927.A.G/1.51062976.A.G/1.51075040.T.A/1.50991473.C.G/1.51063131.C.T/1.51039300.A.G/1.51114808.C.T/1.51038327.T.A/1.51115173.T.C/1.51106975.G.T/1.51093690.A.G/1.51114503.T.C/1.51086337.T.C/1.51094008.T.C	0.3595/0.1507/0.0462/0.0284/0.0241/0.0218/0.0214/0.0211/0.0202/0.02/0.0195/0.0192/0.0188/0.017/0.0168/0.0167/0.0156/0.0156/0.0144/0.0127/0.0126/0.0123/0.0116
chr1.82264317.82265905	chr1	82264317	82265905	LPHN2	0	-0.0179	1.82265905.G.A/1.82264317.T.G	0.9412/0.0584
chr1.89144053.89293294	chr1	89144053	89293294	PKN2	0	0.0228	1.89293294.CCCCTTCCCTT.C/1.89144053.A.G/1.89146852.A.G/1.89148503.A.C/1.89242372.A.G/1.89148793.G.T	0.5542/0.1651/0.1537/0.0125/0.0119/0.0102
chr1.93547830.93547830	chr1	93547830	93547830	MTF2	0	-0.0117	1.93547830.C.CT	0.9683
chr1.96815343.96854533	chr1	96815343	96854533	RP11-147C23.1	326908	-0.0099	1.96831504.T.A/1.96831542.A.G/1.96831613.G.A/1.96831180.C.T/1.96823803.T.C/1.96830675.C.A/1.96836927.C.T/1.96836939.C.T/1.96824413.A.G/1.96827125.G.C/1.96845641.C.T/1.96854533.A.G/1.96820156.C.T/1.96815697.C.A/1.96815343.G.A	0.1057/0.103/0.0949/0.0895/0.0854/0.0737/0.0721/0.0532/0.0519/0.0449/0.0388/0.0354/0.0262/0.0141/0.011
chr1.101659343.101659343	chr1	101659343	101659343	S1PR1	43100	0.0204	1.101659343.T.C	1
chr1.109817192.109822166	chr1	109817192	109822166	CELSR2	0	-0.0091	1.109817192.A.G/1.109818306.G.T/1.109817838.T.C/1.109821307.G.T/1.109818530.C.T/1.109821511.T.G/1.109817590.G.T/1.109822143.G.A/1.109821797.G.A/1.109822166.G.A/1.109818158.C.CT	0.1763/0.1433/0.1051/0.1015/0.0862/0.0765/0.0748/0.0667/0.0579/0.0491/0.0424
chr1.111675762.111726288	chr1	111675762	111726288	CEPT1	0	-0.0136	1.111684276.A.G/1.111682307.G.C/1.111684719.A.G/1.111675762.G.A/1.111708627.G.A/1.111721354.G.T/1.111726288.T.G/1.111694258.T.A/1.111679736.G.A	0.2414/0.16/0.1529/0.1018/0.0793/0.0758/0.0755/0.06/0.0322
chr1.115130508.115130508	chr1	115130508	115130508	DENND2C	0	0.0086	1.115130508.A.G	0.9776
chr1.150725401.150954671	chr1	150725401	150954671	ANXA9	0	-0.0138	1.150954671.G.A/1.150940625.T.G/1.150951477.T.C/1.150842696.C.T/1.150725401.C.A	0.4234/0.245/0.2395/0.0373/0.0204
chr1.150292561.150935811	chr1	150292561	150935811	CERS2	0	-0.0139	1.150551327.G.A/1.150521099.A.T/1.150292561.C.T/1.150568749.C.T/1.150574307.A.C/1.150762876.A.G/1.150935811.C.T/1.150737090.C.T/1.150650581.G.A/1.150627520.A.T	0.5755/0.1202/0.0749/0.0578/0.0322/0.0268/0.0255/0.0169/0.0163/0.0133
chr1.151804213.151804213	chr1	151804213	151804213	RORC	0	0.0162	1.151804213.G.A	1
chr1.151784547.151784994	chr1	151784547	151784994	RORC	0	0.0124	1.151784994.C.T/1.151784547.G.A	0.5753/0.3966
chr1.151793571.151805819	chr1	151793571	151805819	RORC	0	0.0122	1.151804907.T.C/1.151803764.G.C/1.151799790.T.A/1.151802639.C.T/1.151793571.C.G/1.151805049.A.G/1.151797693.C.T/1.151805819.C.T/1.151803664.C.T	0.2514/0.1287/0.1166/0.1147/0.1082/0.1005/0.0575/0.0526/0.0502
chr1.154243097.154260361	chr1	154243097	154260361	HAX1	0	-0.0121	1.154245142.T.G/1.154243097.G.A/1.154251259.A.T/1.154260361.C.G/1.154259650.G.A/1.154257718.T.C/1.154257188.A.T/1.154251626.A.G/1.154258864.C.T	0.2836/0.2088/0.1609/0.0684/0.0536/0.0519/0.0476/0.0458/0.0393
chr1.155079477.155086571	chr1	155079477	155086571	EFNA1	13365	-0.0353	1.155079477.C.T/1.155086148.G.A/1.155085898.C.A/1.155086571.C.T/1.155083289.A.T	0.4652/0.2374/0.1123/0.0775/0.0688
chr1.155572575.155640115	chr1	155572575	155640115	YY1AP1	0	0.0097	1.155640115.C.T/1.155572575.T.C	0.8995/0.082
chr1.156883493.156969896	chr1	156883493	156969896	ARHGEF11	0	0.01	1.156907081.T.C/1.156969896.G.T/1.156883493.G.A	0.8012/0.0177/0.0122
chr1.161653737.161671306	chr1	161653737	161671306	FCGR2B	5294	0.018	1.161666633.A.G/1.161670827.C.T/1.161662005.C.T/1.161660209.C.A/1.161671306.G.T/1.161653737.T.C/1.161660718.T.C/1.161661411.G.T/1.161658821.A.G	0.1836/0.1271/0.1222/0.1171/0.105/0.0885/0.0845/0.0839/0.0699
chr1.161500712.161510516	chr1	161500712	161510516	FCGR3A	1033	0.0122	1.161500796.C.G/1.161503013.A.G/1.161500712.G.T/1.161510516.C.G/1.161510434.G.A	0.6263/0.1597/0.0794/0.0668/0.0115
chr1.177937755.177964578	chr1	177937755	177964578	SEC16B	0	0.01	1.177938437.G.A/1.177947525.A.G/1.177951803.A.G/1.177948578.T.C/1.177940218.C.CTT/1.177964578.A.G/1.177943591.A.G/1.177940612.A.G/1.177964518.T.C/1.177943744.C.CA/1.177962083.C.G/1.177963427.C.A/1.177960702.T.C/1.177961934.G.T/1.177960892.G.C/1.177937755.A.G/1.177963644.A.C	0.1474/0.1346/0.1314/0.1314/0.0639/0.0549/0.0528/0.0465/0.0401/0.0374/0.023/0.0182/0.0158/0.0156/0.0153/0.0143/0.014
chr1.200260443.200269903	chr1	200260443	200269903	ZNF281	104165	0.0172	1.200265895.C.G/1.200265781.G.A/1.200265274.T.C/1.200264559.A.G/1.200263794.C.T/1.200269213.G.A/1.200263697.C.A/1.200266797.A.C/1.200264100.T.C/1.200263327.G.T/1.200263195.C.T/1.200260443.T.C/1.200263154.A.G/1.200268791.G.T/1.200269903.T.C	0.1374/0.1125/0.0785/0.0681/0.0628/0.0622/0.0569/0.0524/0.0523/0.052/0.0508/0.0477/0.0441/0.0434/0.0327
chr1.200014762.200020422	chr1	200014762	200020422	NR5A2	0	0.0111	1.200020182.G.A/1.200014762.A.G/1.200016146.T.C/1.200020422.C.CATT	0.6921/0.1133/0.1022/0.0876
chr1.200175320.200184533	chr1	200175320	200184533	NR5A2	28769	0.0096	1.200176517.AAG.A/1.200183460.C.T/1.200184533.T.C/1.200184333.G.A/1.200181001.A.T/1.200184233.G.A/1.200177195.A.G/1.200180615.C.T/1.200180654.C.T/1.200181338.G.A/1.200181142.C.T/1.200178503.A.AAACAACAACAAC/1.200176910.C.T/1.200175320.C.T/1.200180511.A.G/1.200178964.C.A	0.6366/0.0239/0.0222/0.0203/0.0201/0.0184/0.0154/0.0142/0.0138/0.0137/0.0128/0.0125/0.0123/0.0119/0.0105/0.0105
chr1.205461223.205461563	chr1	205461223	205461563	CDK18	12160	-0.0118	1.205461535.A.T/1.205461563.T.C/1.205461223.G.C	0.4169/0.3347/0.2484
chr1.206846511.206897727	chr1	206846511	206897727	MAPKAPK2	0	0.0091	1.206864573.G.A/1.206876806.G.A/1.206876797.C.G/1.206877337.C.T/1.206879122.G.T/1.206896876.G.T/1.206897727.G.A/1.206846511.GGTGT.G/1.206850230.A.G	0.2854/0.1673/0.1673/0.1028/0.0967/0.0619/0.0274/0.0157/0.0149
chr1.212379741.212408261	chr1	212379741	212408261	PPP2R5A	50618	0.0098	1.212408261.G.C/1.212402564.A.G/1.212405792.C.T/1.212398929.G.GTGTT/1.212379741.A.C	0.61/0.1953/0.0624/0.0602/0.0257
chr1.225872358.225892025	chr1	225872358	225892025	ENAH	31515	0.0106	1.225882159.A.G/1.225874059.G.C/1.225892025.T.C/1.225875698.T.C/1.225875408.T.C/1.225885157.C.T/1.225883765.A.G/1.225880446.A.C/1.225882411.T.C/1.225883066.A.G/1.225881238.A.G/1.225879995.G.T/1.225878778.C.T/1.225878880.A.C/1.225878851.G.A/1.225872358.A.G	0.3124/0.1074/0.1036/0.1021/0.0756/0.0612/0.0375/0.0196/0.0184/0.0183/0.018/0.018/0.0149/0.013/0.012/0.0101
chr1.227216662.227576220	chr1	227216662	227576220	CDC42BPA	0	-0.0107	1.227399214.C.T/1.227419053.C.T/1.227254045.C.T/1.227374872.C.T/1.227420033.A.G/1.227418130.T.C/1.227418928.T.C/1.227219314.A.G/1.227419358.T.C/1.227216662.T.C/1.227420985.A.C/1.227217786.T.A/1.227217665.A.G/1.227477442.A.G/1.227576220.C.A	0.5429/0.0898/0.0653/0.0393/0.0299/0.0282/0.0274/0.0228/0.0227/0.0178/0.0138/0.0118/0.0118/0.0104/0.0103
chr1.232765657.232780848	chr1	232765657	232780848	SIPA1L2	68354	0.0152	1.232766721.G.C/1.232766725.A.C/1.232776028.C.T/1.232767060.T.C/1.232772542.G.A/1.232767864.T.C/1.232765657.G.C/1.232779187.C.T/1.232765830.C.G/1.232780848.C.A/1.232776557.T.A/1.232776994.C.T/1.232779677.G.C/1.232777462.C.G	0.2147/0.1962/0.1062/0.1046/0.0615/0.0586/0.0487/0.0336/0.0284/0.0177/0.0161/0.0122/0.0118/0.0111
chr1.232812003.232812003	chr1	232812003	232812003	SIPA1L2	114699	-0.0136	1.232812003.C.T	1
chr1.235094931.235094931	chr1	235094931	235094931	TOMM20	177719	0.0141	1.235094931.A.G	1
chr1.235095905.235096612	chr1	235095905	235096612	TOMM20	176039	-0.0094	1.235095905.A.G/1.235096612.C.T	0.6573/0.3245
chr2.242793.242793	chr2	242793	242793	SH3YL1	0	0.0111	2.242793.G.C	0.9298
chr2.3639909.3642361	chr2	3639909	3642361	COLEC11	65	-0.0165	2.3640142.C.T/2.3642361.T.C/2.3639921.C.G/2.3639909.C.G	0.6748/0.1135/0.1064/0.099
chr2.20242825.20242825	chr2	20242825	20242825	LAPTM4A	0	-0.0113	2.20242825.G.A	0.971
chr2.27730940.27730940	chr2	27730940	27730940	GCKR	0	-0.0419	2.27730940.T.C	1
chr2.27262648.27262648	chr2	27262648	27262648	TMEM214	0	0.0092	2.27262648.T.C	0.9883
chr2.44067819.44072145	chr2	44067819	44072145	ABCG8	0	0.009	2.44070639.T.C/2.44070251.T.C/2.44071743.A.G/2.44069918.A.AT/2.44071639.C.T/2.44067819.T.G/2.44070394.A.G/2.44069517.C.T/2.44070935.A.G/2.44071852.G.C/2.44070780.G.A/2.44069781.A.T/2.44072145.T.G/2.44071833.A.C/2.44069702.C.A/2.44071625.C.A	0.3063/0.0807/0.06/0.0456/0.0453/0.0441/0.0434/0.0411/0.0322/0.0316/0.0311/0.0299/0.026/0.0181/0.0179/0.0173
chr2.48641585.48654672	chr2	48641585	48654672	PPP1R21	13065	-0.0175	2.48653703.A.G/2.48641585.G.C/2.48654672.A.G/2.48647871.T.C/2.48648884.G.A	0.7073/0.1429/0.0486/0.0417/0.0172
chr2.64887382.64924037	chr2	64887382	64924037	SERTAD2	0	0.0161	2.64916181.A.C/2.64915583.C.A/2.64913045.C.G/2.64923808.C.T/2.64905729.T.C/2.64906295.A.G/2.64924037.C.T/2.64908033.T.C/2.64906787.C.T/2.64906800.G.C/2.64903354.C.T/2.64901725.G.C/2.64887382.C.T/2.64902387.A.T/2.64909166.T.C/2.64889908.C.T	0.2641/0.1718/0.076/0.061/0.0563/0.0545/0.039/0.0376/0.0358/0.0306/0.0276/0.0275/0.0264/0.0217/0.0172/0.0141
chr2.111874699.111933001	chr2	111874699	111933001	BCL2L11	0	-0.0098	2.111887754.T.G/2.111916868.A.C/2.111876539.T.C/2.111891795.T.C/2.111874699.G.T/2.111900560.T.C/2.111888043.G.A/2.111923086.G.GT/2.111894874.C.T/2.111913056.T.C/2.111908567.C.T/2.111933001.G.T	0.2344/0.0932/0.089/0.0853/0.0647/0.0637/0.0609/0.0602/0.0548/0.054/0.0523/0.042
chr2.112245586.112261030	chr2	112245586	112261030	ANAPC1	262818	-0.0089	2.112251121.G.A/2.112245586.G.C/2.112256611.G.C/2.112256320.T.C/2.112253851.T.C/2.112250665.C.T/2.112258164.T.C/2.112257811.T.G/2.112249176.C.T/2.112249583.G.A/2.112261030.G.A	0.1841/0.1384/0.097/0.0877/0.0871/0.0805/0.0683/0.0606/0.0582/0.0538/0.0314
chr2.121306440.121310269	chr2	121306440	121310269	FLJ14816	82744	0.0149	2.121306440.G.A/2.121310269.A.C	0.8923/0.1061
chr2.133174764.133194032	chr2	133174764	133194032	GPR39	0	-0.0182	2.133174764.C.T/2.133174999.A.G/2.133183996.G.A/2.133194032.T.C/2.133193857.G.A	0.7929/0.1096/0.0225/0.0143/0.0129
chr2.135837906.136616754	chr2	135837906	136616754	MCM6	0	-0.0125	2.136608646.G.A/2.136616754.C.T/2.135837906.C.A/2.136381348.G.A/2.135907088.A.G/2.135954797.T.C/2.136138627.A.G/2.136098560.T.TATTG	0.7104/0.0834/0.0664/0.0261/0.022/0.0157/0.0146/0.0138
chr2.165501927.165545373	chr2	165501927	165545373	COBLL1	0	-0.0128	2.165513091.T.C/2.165528624.G.T/2.165528876.C.T/2.165508389.C.T/2.165532454.A.G/2.165501927.T.TG/2.165539661.T.C/2.165511794.C.G/2.165545373.C.CAA	0.2117/0.1945/0.1602/0.138/0.08/0.0794/0.0221/0.0178/0.0131
chr2.169893419.169933741	chr2	169893419	169933741	DHRS9	0	0.016	2.169933741.G.A/2.169902917.A.C/2.169931266.T.TGAACCTTAGAGACTGAAGAA/2.169893419.G.A	0.7454/0.145/0.0535/0.0388
chr2.169820801.169820801	chr2	169820801	169820801	ABCB11	0	0.0118	2.169820801.C.T	1
chr2.174841643.174852507	chr2	174841643	174852507	SP3	11214	-0.0112	2.174844867.C.T/2.174841643.C.T/2.174852507.A.AG/2.174850063.G.A/2.174850126.T.C/2.174848670.C.T/2.174850890.G.A/2.174851673.C.T/2.174850873.A.G/2.174849854.T.C	0.8077/0.0187/0.0157/0.0152/0.0133/0.0131/0.0123/0.012/0.0118/0.011
chr2.191432139.191494411	chr2	191432139	191494411	NAB1	17061	-0.0109	2.191479455.C.T/2.191439248.T.C/2.191471847.C.T/2.191438741.A.C/2.191471428.G.A/2.191441595.T.C/2.191469322.C.T/2.191494411.A.G/2.191446268.T.G/2.191446252.A.G/2.191453375.A.G/2.191475778.C.A/2.191452899.G.T/2.191432139.G.A/2.191488854.T.G/2.191466532.A.G/2.191474684.A.C	0.1241/0.1118/0.1015/0.0852/0.0606/0.0588/0.0537/0.0499/0.0493/0.0476/0.045/0.0333/0.029/0.029/0.0272/0.0257/0.0223
chr2.192109966.192112652	chr2	192109966	192112652	MYO1B	0	0.0298	2.192112652.A.G/2.192111616.C.T/2.192109966.G.A/2.192110219.C.T/2.192112050.T.G	0.6183/0.2176/0.0541/0.034/0.0265
chr2.219699999.219699999	chr2	219699999	219699999	PRKAG3	3190	0.0093	2.219699999.G.A	0.9577
chr2.231901385.232053167	chr2	231901385	232053167	HTR2B	0	0.0089	2.231907978.A.C/2.231907054.C.T/2.231906993.C.A/2.231906485.G.T/2.231913056.C.T/2.232053167.G.A/2.231913395.G.T/2.231914845.C.T/2.231904880.C.T/2.231907894.C.A/2.231902020.G.A/2.231901957.A.C/2.231901385.C.A/2.231916926.G.T	0.1326/0.12/0.1175/0.1125/0.0897/0.0704/0.0679/0.0549/0.04/0.0224/0.0187/0.0182/0.0156/0.0104
chr2.233509791.233520254	chr2	233509791	233520254	EFHD1	0	0.02	2.233517701.G.T/2.233520254.A.T/2.233509791.C.G/2.233510011.C.T/2.233513175.C.A	0.7054/0.1966/0.0249/0.021/0.0173
chr3.4756338.4765955	chr3	4756338	4765955	ITPR1	0	-0.0213	3.4763301.G.A/3.4758244.T.G/3.4764171.A.G/3.4765955.G.A/3.4757029.A.C/3.4756338.G.T/3.4757846.T.C/3.4764177.A.G/3.4761185.G.A	0.3559/0.1665/0.1296/0.0797/0.0673/0.0458/0.0372/0.0366/0.0324
chr3.4909440.4909440	chr3	4909440	4909440	AC018816.3	0	0.0101	3.4909440.T.C	0.9953
chr3.4757859.4764466	chr3	4757859	4764466	ITPR1	0	-0.0092	3.4764466.C.G/3.4762697.A.G/3.4761477.A.C/3.4757859.C.G	0.4111/0.3473/0.1863/0.0168
chr3.12336507.12396913	chr3	12336507	12396913	PPARG	0	-0.024	3.12393125.C.G/3.12336507.G.A/3.12386337.C.T/3.12396913.G.A/3.12344730.C.G	0.8763/0.0287/0.0141/0.0119/0.0107
chr3.12641425.12742026	chr3	12641425	12742026	RAF1	0	-0.0097	3.12655689.T.G/3.12662449.G.A/3.12742026.G.A/3.12641425.T.C/3.12683446.A.T/3.12738911.G.A/3.12660951.T.C/3.12738922.C.T/3.12674987.T.TA/3.12735637.G.A	0.1461/0.0984/0.0947/0.0888/0.0832/0.0825/0.0775/0.0734/0.0593/0.0357
chr3.25630066.25645514	chr3	25630066	25645514	TOP2B	0	-0.0093	3.25630066.G.A/3.25635743.T.C/3.25645514.G.A	0.7293/0.081/0.0106
chr3.29359952.29368787	chr3	29359952	29368787	RBMS3	0	0.0139	3.29359952.T.C/3.29368787.T.A	0.8705/0.1295
chr3.39190775.39214256	chr3	39190775	39214256	CSRNP1	0	-0.0094	3.39195260.G.C/3.39191029.A.G/3.39190775.A.G/3.39191335.T.C/3.39196452.A.G/3.39214256.C.T	0.4006/0.1959/0.1623/0.1527/0.0209/0.0192
chr3.52555957.52833805	chr3	52555957	52833805	ITIH3	0	-0.0109	3.52567617.A.G/3.52566914.C.A/3.52558008.T.C/3.52566065.T.C/3.52567014.G.T/3.52559705.G.A/3.52566682.G.A/3.52568805.G.T/3.52720080.A.C/3.52833805.C.A/3.52823179.C.CT/3.52752959.C.G/3.52555957.T.C/3.52565100.T.C/3.52722335.A.C	0.4073/0.1032/0.0808/0.062/0.0512/0.0373/0.0213/0.0208/0.0207/0.0153/0.0149/0.0143/0.0112/0.0112/0.0108
chr3.71291620.71294722	chr3	71291620	71294722	FOXP1	0	0.0102	3.71291620.A.G/3.71294722.T.G	0.7611/0.2314
chr3.112780021.112811044	chr3	112780021	112811044	C3orf17	41314	-0.0102	3.112798076.T.A/3.112811044.G.A/3.112780021.A.G	0.8324/0.0972/0.05
chr3.119529605.119530858	chr3	119529605	119530858	NR1I2	0	-0.0134	3.119529689.C.T/3.119529605.A.G/3.119530858.G.A	0.3855/0.3186/0.2602
chr3.123518876.123536182	chr3	123518876	123536182	MYLK	0	-0.014	3.123518876.G.T/3.123519579.C.T/3.123520733.C.T/3.123527730.A.C/3.123536043.T.C/3.123532520.A.G/3.123536182.T.C/3.123532820.C.T/3.123530145.A.G/3.123524834.T.A/3.123530334.T.C/3.123534283.C.T/3.123526107.C.G/3.123529108.C.T/3.123526079.C.T/3.123521977.G.A/3.123525579.G.A/3.123533702.T.C/3.123523646.T.G	0.1783/0.1/0.0776/0.0556/0.0531/0.0522/0.0489/0.0417/0.0381/0.0329/0.0326/0.0323/0.0317/0.0311/0.031/0.0307/0.0306/0.0277/0.0263
chr3.124339527.124341806	chr3	124339527	124341806	KALRN	0	-0.016	3.124339527.G.A/3.124340093.G.A/3.124340222.G.C/3.124341806.T.C/3.124341152.T.G	0.259/0.2432/0.2078/0.1987/0.0801
chr3.126058362.126060315	chr3	126058362	126060315	KLF15	1163	-0.0142	3.126060315.T.C/3.126058362.A.G/3.126058549.A.T	0.5132/0.2478/0.2383
chr3.129338884.129603906	chr3	129338884	129603906	TMCC1	0	-0.0096	3.129338884.C.T/3.129441539.T.G/3.129603906.C.T	0.7796/0.0404/0.0394
chr3.149100297.149122942	chr3	149100297	149122942	TM4SF1	4646	0.012	3.149105726.A.C/3.149105289.C.A/3.149100297.C.A/3.149104849.C.T/3.149109426.T.C/3.149122942.C.T/3.149101775.A.G	0.2406/0.218/0.1452/0.1301/0.1035/0.0748/0.0718
chr3.156794425.156798775	chr3	156794425	156798775	LEKR1	30508	0.0088	3.156798775.T.C/3.156798732.A.G/3.156795468.A.G/3.156798294.A.G/3.156795525.A.G/3.156797225.T.C/3.156797373.T.C/3.156797702.G.A/3.156797208.T.G/3.156798473.C.A/3.156797941.T.C/3.156797648.C.T/3.156797609.T.C/3.156794425.C.G	0.216/0.2152/0.092/0.0612/0.0476/0.0456/0.0444/0.044/0.0379/0.0348/0.0336/0.0245/0.0236/0.0232
chr3.170713380.170732300	chr3	170713380	170732300	SLC2A2	0	0.0316	3.170732300.G.A/3.170721231.G.T/3.170723664.A.G/3.170723276.G.A/3.170729873.G.C/3.170727658.G.A/3.170723668.C.T/3.170726363.C.G/3.170722448.A.G/3.170724390.G.A/3.170729414.G.A/3.170718253.G.A/3.170729552.C.A/3.170725730.C.T/3.170727408.A.G/3.170720021.G.C/3.170713522.G.T/3.170727739.T.A/3.170717996.A.G/3.170722832.TG.T/3.170713380.T.C/3.170714470.A.T	0.2459/0.0993/0.0919/0.0546/0.0495/0.0475/0.0411/0.0378/0.0361/0.0285/0.0283/0.0225/0.0206/0.0184/0.0178/0.0164/0.0156/0.012/0.0117/0.0113/0.0108/0.01
chr3.172294500.172294500	chr3	172294500	172294500	TNFSF10	53203	0.0198	3.172294500.G.A	1
chr3.172310820.172313367	chr3	172310820	172313367	NCEH1	34672	0.0104	3.172313367.T.C/3.172311712.A.G/3.172310820.G.T	0.5236/0.3303/0.1407
chr3.187843210.187890435	chr3	187843210	187890435	LPP	0	0.0097	3.187866554.T.C/3.187865419.A.G/3.187865100.T.C/3.187890435.T.C/3.187843210.C.T/3.187843694.T.TA/3.187888335.G.T/3.187843738.G.A/3.187887562.G.T/3.187844390.A.C	0.2191/0.2167/0.1821/0.0877/0.0666/0.0576/0.0365/0.0285/0.0271/0.0189
chr4.3443931.3443931	chr4	3443931	3443931	HGFAC	0	-0.0203	4.3443931.A.G	1
chr4.17496071.17501474	chr4	17496071	17501474	QDPR	0	-0.0094	4.17496071.C.T/4.17501474.C.T	0.4987/0.4674
chr4.37482779.37491386	chr4	37482779	37491386	C4orf19	0	0.0127	4.37482779.T.A/4.37485273.G.C/4.37489082.G.A/4.37486328.A.C/4.37491386.T.C	0.362/0.2032/0.1523/0.1399/0.1271
chr4.69533217.69538180	chr4	69533217	69538180	UGT2B15	0	-0.0206	4.69536084.A.C/4.69537154.A.C/4.69537733.T.G/4.69537475.A.G/4.69537915.T.C/4.69538180.G.A/4.69533221.A.T/4.69533217.A.C	0.2516/0.1643/0.107/0.0995/0.0993/0.0961/0.0793/0.0793
chr4.69373407.69373407	chr4	69373407	69373407	TMPRSS11E	10085	-0.0157	4.69373407.T.C	0.9971
chr4.77070290.77203041	chr4	77070290	77203041	FAM47E-STBD1	0	0.0098	4.77110311.C.G/4.77070290.G.A/4.77129568.C.G/4.77117309.G.A/4.77127771.T.A/4.77203041.G.A/4.77128724.G.A/4.77192838.A.C	0.7945/0.0285/0.0214/0.0169/0.0132/0.0109/0.0106/0.0104
chr4.77634465.77678666	chr4	77634465	77678666	SHROOM3	0	-0.0083	4.77662486.G.T/4.77662125.C.T/4.77644366.C.A/4.77644179.G.A/4.77644221.T.C/4.77678666.C.T/4.77668251.G.A/4.77657391.G.C/4.77656886.G.A/4.77649776.C.T/4.77634465.C.T/4.77641065.G.A/4.77649374.T.C/4.77641679.A.G	0.1524/0.0972/0.0791/0.0783/0.0769/0.0716/0.0597/0.05/0.0499/0.0488/0.0407/0.0396/0.0317/0.024
chr4.88196855.88230492	chr4	88196855	88230492	HSD17B13	0	0.0097	4.88199484.T.G/4.88230492.C.T/4.88200183.G.A/4.88197606.C.A/4.88198024.A.G/4.88196855.A.T/4.88197499.T.C/4.88199059.A.G/4.88202407.T.A/4.88208947.C.T	0.6289/0.0722/0.0555/0.0394/0.0333/0.016/0.0143/0.0138/0.0122/0.012
chr4.89676867.89677537	chr4	89676867	89677537	FAM13A	0	0.0123	4.89676867.CTA.C/4.89677537.T.C	0.5135/0.4803
chr4.103188709.103198082	chr4	103188709	103198082	SLC39A8	0	-0.0137	4.103188709.C.T/4.103198082.A.G	0.9203/0.0797
chr4.146821410.146821410	chr4	146821410	146821410	ZNF827	0	0.0582	4.146821410.C.A	1
chr4.146638084.146653620	chr4	146638084	146653620	C4orf51	0	0.009	4.146641790.C.T/4.146647556.C.T/4.146638365.G.A/4.146638127.A.G/4.146638084.G.T/4.146638845.G.A/4.146653620.G.A/4.146639774.A.C/4.146650833.C.G/4.146640533.G.A/4.146651480.C.G/4.146640562.C.A	0.2015/0.1861/0.0964/0.0938/0.064/0.0519/0.0468/0.0365/0.029/0.028/0.0261/0.0234
chr4.186629035.186647572	chr4	186629035	186647572	SORBS2	0	-0.0094	4.186647572.G.T/4.186629035.A.G/4.186636425.C.T/4.186629808.G.A/4.186637369.C.T/4.186634733.T.C/4.186637769.C.G	0.6761/0.1418/0.0226/0.0126/0.0126/0.0124/0.0111
chr5.25678049.25690529	chr5	25678049	25690529	CDH10	1032963	-0.0091	5.25683424.A.AT/5.25689954.C.T/5.25690529.C.A/5.25682227.T.C/5.25678049.A.G/5.25678072.A.G	0.3228/0.2795/0.1546/0.0766/0.0547/0.048
chr5.31020521.31021358	chr5	31020521	31021358	CDH6	172499	-0.0376	5.31021358.A.G/5.31020521.A.G	0.8183/0.1817
chr5.38556685.38605918	chr5	38556685	38605918	LIFR	0	0.01	5.38581262.C.T/5.38595706.C.G/5.38569857.A.G/5.38579325.T.C/5.38556685.G.C/5.38593078.G.C/5.38560540.G.A/5.38580741.A.G/5.38583008.A.C/5.38565164.T.C/5.38596468.A.G/5.38563960.A.G/5.38597478.A.G/5.38603639.C.A/5.38596645.TA.T/5.38596647.GA.G/5.38605918.A.G	0.2163/0.078/0.0735/0.0659/0.0634/0.0627/0.0618/0.0518/0.0422/0.0358/0.0346/0.0334/0.0325/0.0301/0.0178/0.0178/0.0143
chr5.52193125.52193125	chr5	52193125	52193125	ITGA1	0	0.032	5.52193125.A.G	1
chr5.52062147.52106278	chr5	52062147	52106278	PELO	0	-0.0111	5.52062994.C.T/5.52088271.G.A/5.52095024.C.T/5.52095934.C.A/5.52062147.C.T/5.52080909.T.C/5.52083226.A.G/5.52100639.G.C/5.52106278.T.G	0.1433/0.1361/0.1292/0.1229/0.1152/0.1139/0.1057/0.0668/0.0612
chr5.53283630.53304351	chr5	53283630	53304351	ARL15	0	0.0116	5.53283630.T.A/5.53303816.C.G/5.53304351.C.T	0.9103/0.0369/0.0298
chr5.55856375.55861894	chr5	55856375	55861894	AC022431.2	0	0.0129	5.55861894.G.A/5.55860781.A.G/5.55861786.C.T/5.55857025.G.GT/5.55861464.C.T/5.55861601.G.A/5.55861595.G.A/5.55856375.G.T/5.55857548.A.AT/5.55859952.A.G/5.55861359.G.A	0.204/0.1593/0.1388/0.1079/0.0712/0.0558/0.0544/0.0512/0.0429/0.039/0.0378
chr5.55802419.55810305	chr5	55802419	55810305	AC022431.2	0	0.0127	5.55808475.C.T/5.55807370.C.T/5.55809138.C.A/5.55806751.A.G/5.55808342.C.T/5.55809465.A.G/5.55810305.A.T/5.55807837.T.C/5.55805639.C.T/5.55803533.G.A/5.55809127.T.C/5.55802419.C.T	0.1567/0.1277/0.1233/0.1134/0.113/0.1119/0.0996/0.0394/0.0258/0.0241/0.0139/0.0134
chr5.67707704.67714246	chr5	67707704	67714246	PIK3R1	110056	0.0095	5.67714246.A.G/5.67713205.G.T/5.67708229.T.A/5.67708390.G.T/5.67707704.G.A	0.558/0.1554/0.1272/0.0621/0.0568
chr5.72124610.72419617	chr5	72124610	72419617	TMEM171	0	0.0134	5.72124610.A.G/5.72159179.C.T/5.72386784.C.T/5.72419617.C.A	0.4565/0.4071/0.0656/0.0399
chr5.75694431.75727731	chr5	75694431	75727731	IQGAP2	0	-0.0115	5.75711767.CA.C/5.75697771.G.C/5.75700310.C.T/5.75704257.A.G/5.75705131.A.G/5.75714419.G.A/5.75694431.C.T/5.75696662.C.T/5.75694592.T.A/5.75727731.G.A/5.75694574.T.A/5.75712616.C.G/5.75713691.A.G/5.75715301.G.A/5.75717455.G.C	0.2618/0.1396/0.1302/0.0989/0.0803/0.0406/0.0366/0.0329/0.0282/0.0257/0.0246/0.0222/0.0147/0.0127/0.0114
chr5.75964507.76023494	chr5	75964507	76023494	F2R	0	-0.0082	5.75996909.G.A/5.76019044.C.T/5.76023494.A.G/5.75964507.C.T	0.7017/0.1279/0.0769/0.044
chr5.106878792.106878792	chr5	106878792	106878792	EFNA5	0	-0.0337	5.106878792.G.C	0.9998
chr5.106889936.106893142	chr5	106889936	106893142	EFNA5	0	0.0176	5.106889936.C.T/5.106893142.C.T	0.5426/0.4532
chr5.106814090.106816967	chr5	106814090	106816967	EFNA5	0	-0.0091	5.106816967.A.G/5.106814090.T.C/5.106816595.A.G/5.106815995.T.C/5.106816453.G.A	0.4508/0.3309/0.0613/0.0578/0.0448
chr5.107007001.107029176	chr5	107007001	107029176	EFNA5	406	0.0115	5.107008378.A.C/5.107008740.G.C/5.107025734.T.C/5.107029176.G.A/5.107019987.A.T/5.107028270.T.G/5.107019986.G.A/5.107023460.C.T/5.107020790.G.A/5.107024658.A.G/5.107025248.A.T/5.107021498.C.A/5.107007001.C.T/5.107019572.G.A/5.107027131.C.A/5.107014713.A.G/5.107010484.A.G/5.107012127.C.A/5.107011352.A.C	0.1852/0.1095/0.0546/0.0513/0.0502/0.0476/0.046/0.0429/0.0388/0.0354/0.0351/0.0347/0.0346/0.0336/0.0331/0.0331/0.0312/0.0311/0.0307
chr5.138222330.138659158	chr5	138222330	138659158	MATR3	0	0.0099	5.138553142.G.T/5.138604414.G.T/5.138271303.T.C/5.138659158.T.C/5.138340449.G.A/5.138591955.A.G/5.138312282.A.G/5.138222330.G.A/5.138549420.A.G	0.2849/0.1223/0.116/0.1143/0.0876/0.0794/0.0785/0.051/0.0302
chr5.139527721.139622272	chr5	139527721	139622272	CYSTM1	0	0.0096	5.139531018.C.T/5.139527721.G.A/5.139622265.G.A/5.139622272.T.C	0.4128/0.1802/0.0149/0.0131
chr5.141302539.141337126	chr5	141302539	141337126	PCDH12	0	0.0086	5.141335284.G.A/5.141335241.A.G/5.141334054.A.G/5.141336264.G.T/5.141337126.C.T/5.141302539.G.A/5.141334286.T.C/5.141333319.G.A/5.141324623.C.T/5.141326962.T.C/5.141305438.T.A/5.141325637.A.T/5.141315681.G.C/5.141328745.T.C/5.141329611.T.C/5.141304314.T.A	0.1617/0.1494/0.1069/0.1014/0.0768/0.0518/0.0455/0.0387/0.0333/0.0307/0.0261/0.025/0.0245/0.0235/0.021/0.017
chr5.148524820.148539987	chr5	148524820	148539987	ABLIM3	0	-0.0095	5.148539987.CTCTAG.C/5.148531983.T.A/5.148524820.C.T	0.4121/0.3566/0.2072
chr5.149124228.149172165	chr5	149124228	149172165	PPARGC1B	0	0.0087	5.149150648.C.T/5.149151707.G.A/5.149152531.G.T/5.149153143.AC.A/5.149156189.G.A/5.149131196.G.A/5.149142709.TTCCCTCCCCACTCTGGCCCTGCAGCC.T/5.149149126.T.C/5.149124228.A.G/5.149172165.A.G	0.2109/0.1947/0.1847/0.141/0.0797/0.0359/0.0265/0.0222/0.0143/0.0133
chr5.166803510.166839285	chr5	166803510	166839285	TENM2	0	0.0157	5.166806029.A.C/5.166831694.C.T/5.166829935.T.C/5.166834397.C.A/5.166834153.C.T/5.166803510.G.T/5.166832662.T.C/5.166837602.T.G/5.166813705.A.G/5.166839285.A.G/5.166815244.T.C/5.166819799.T.C/5.166816521.A.G/5.166816911.G.A	0.254/0.1553/0.0976/0.0844/0.0798/0.079/0.0691/0.0362/0.0204/0.0164/0.0126/0.0122/0.0115/0.01
chr5.166801466.166832918	chr5	166801466	166832918	TENM2	0	-0.0111	5.166806697.A.G/5.166830787.G.A/5.166806876.A.C/5.166832918.C.G/5.166824102.G.T/5.166807860.C.A/5.166807297.A.G/5.166801466.C.T/5.166805515.A.T/5.166831983.C.A/5.166809534.A.C/5.166801883.A.C/5.166824510.C.T/5.166801859.T.G/5.166818733.T.C/5.166823660.G.T/5.166816841.G.A/5.166810637.C.A/5.166817644.A.C	0.1559/0.1019/0.0981/0.076/0.0718/0.0681/0.0592/0.0423/0.0406/0.0368/0.0321/0.0284/0.0264/0.0258/0.0227/0.0209/0.0189/0.0141/0.0125
chr5.171780628.171867522	chr5	171780628	171867522	SH3PXD2B	0	-0.0086	5.171865093.C.T/5.171865080.G.C/5.171865548.C.T/5.171857208.C.G/5.171866950.C.T/5.171861204.C.A/5.171861463.G.A/5.171867257.C.T/5.171858228.A.G/5.171867309.C.T/5.171859007.C.T/5.171859668.C.T/5.171780628.C.T/5.171859681.C.G/5.171858118.A.G/5.171867522.CAT.C/5.171858220.T.C	0.1545/0.1436/0.1239/0.0646/0.0525/0.0474/0.0396/0.0359/0.0353/0.0302/0.0299/0.0297/0.025/0.0212/0.0209/0.0185/0.0128
chr6.396321.475489	chr6	396321	475489	IRF4	0	-0.0128	6.475489.C.T/6.396321.C.T/6.422631.C.A	0.8108/0.1203/0.0676
chr6.7205796.7221743	chr6	7205796	7221743	RREB1	0	-0.011	6.7216167.A.G/6.7221743.G.A/6.7205796.G.A/6.7214923.C.T/6.7212744.C.A/6.7216247.C.T/6.7215541.C.T/6.7215565.G.A/6.7215033.A.G/6.7209839.G.C/6.7213279.C.T/6.7212084.C.T/6.7211818.G.A/6.7206864.T.TA	0.2406/0.1032/0.098/0.0826/0.0816/0.0649/0.056/0.0552/0.0508/0.0352/0.0301/0.029/0.0144/0.0133
chr6.7251130.7251130	chr6	7251130	7251130	RREB1	0	-0.0096	6.7251130.G.T	0.9921
chr6.21921205.21926992	chr6	21921205	21926992	SOX4	322359	-0.0229	6.21924326.T.G/6.21926081.A.G/6.21926992.G.A/6.21923491.A.G/6.21924904.T.C/6.21923532.A.G/6.21923651.C.G/6.21924164.G.A/6.21922081.G.A/6.21922156.C.T/6.21921205.T.C/6.21922559.G.A/6.21922343.C.T/6.21922009.C.A/6.21921951.C.T	0.2415/0.1469/0.0951/0.0626/0.0592/0.0551/0.0531/0.0418/0.0336/0.0324/0.0254/0.0252/0.019/0.0164/0.0135
chr6.34592090.34800435	chr6	34592090	34800435	UHRF1BP1	0	-0.015	6.34616322.G.C/6.34603691.G.A/6.34592090.A.G/6.34800435.C.T	0.4495/0.3109/0.1734/0.0516
chr6.36650565.36658092	chr6	36650565	36658092	CDKN1A	0	0.0087	6.36651971.C.A/6.36650565.G.C/6.36653597.C.T/6.36658092.C.T/6.36657837.G.A	0.8174/0.0491/0.0363/0.02/0.0153
chr6.41666065.41694773	chr6	41666065	41694773	TFEB	0	0.0088	6.41681036.G.A/6.41683395.G.A/6.41694773.G.A/6.41681183.G.A/6.41666292.A.C/6.41673067.T.C/6.41676269.G.A/6.41685899.T.C/6.41684645.A.C/6.41687252.G.C/6.41674424.G.A/6.41679691.C.T/6.41666065.G.A/6.41681878.C.T/6.41681968.C.T/6.41681835.G.A/6.41671578.C.A/6.41676499.G.A/6.41676452.G.A	0.1138/0.1051/0.091/0.0863/0.0759/0.0691/0.0528/0.0527/0.0459/0.0394/0.0313/0.0309/0.0271/0.0271/0.0232/0.0194/0.0185/0.0161/0.0161
chr6.43731854.43747450	chr6	43731854	43747450	VEGFA	0	-0.0095	6.43747450.G.A/6.43737794.A.G/6.43747248.C.T/6.43740678.T.C/6.43736496.T.C/6.43742626.T.C/6.43736415.TGGTCCCACTCTTCCCACA.T/6.43736537.T.TG/6.43739989.C.T/6.43737486.C.T/6.43736389.A.C/6.43731854.C.T	0.2054/0.1107/0.0924/0.0884/0.0792/0.0725/0.0622/0.0602/0.0572/0.0563/0.0481/0.0266
chr6.52445000.52459940	chr6	52445000	52459940	TRAM2	3288	0.0097	6.52457152.G.T/6.52453985.T.A/6.52448347.T.TA/6.52459940.A.G/6.52458678.C.G/6.52445000.A.G/6.52452585.A.G/6.52453608.G.C	0.3095/0.2077/0.1877/0.0744/0.0693/0.0387/0.0378/0.0309
chr6.52290927.52360545	chr6	52290927	52360545	EFHC1	0	-0.009	6.52360545.T.C/6.52290927.T.C/6.52315319.T.G/6.52303990.G.A/6.52296461.G.C/6.52338097.C.T/6.52331939.A.G/6.52342732.C.T	0.4145/0.175/0.0773/0.0678/0.0658/0.0568/0.0523/0.0371
chr6.53899341.53924697	chr6	53899341	53924697	MLIP	0	-0.0273	6.53903152.G.A/6.53902843.G.A/6.53910988.T.G/6.53912613.C.T/6.53899341.C.T/6.53924697.T.C	0.3604/0.2937/0.2016/0.0455/0.045/0.0193
chr6.107420516.107442431	chr6	107420516	107442431	BEND3	0	0.0108	6.107442431.C.T/6.107420516.A.C	0.8564/0.1139
chr6.108864419.108927842	chr6	108864419	108927842	FOXO3	0	0.009	6.108888593.C.G/6.108927842.A.G/6.108908518.G.T/6.108876002.G.A/6.108926496.A.G/6.108864419.C.T/6.108896215.A.G/6.108895386.C.T/6.108905680.G.A/6.108894438.C.T/6.108877653.G.GT/6.108867031.C.A	0.1576/0.1513/0.1075/0.0895/0.0757/0.0736/0.0699/0.0606/0.0483/0.0427/0.0325/0.0324
chr6.153043035.153061375	chr6	153043035	153061375	MYCT1	0	0.013	6.153043035.G.A/6.153061375.G.A	0.9485/0.0491
chr6.158398815.158410946	chr6	158398815	158410946	SYNJ2	0	0.0144	6.158407052.A.G/6.158405680.C.T/6.158406805.G.C/6.158402708.T.C/6.158407309.C.T/6.158400742.C.T/6.158409245.A.G/6.158398910.A.C/6.158398909.A.C/6.158398908.A.AG/6.158398907.T.G/6.158410946.G.A/6.158398815.G.T	0.1746/0.1555/0.1509/0.1477/0.1182/0.0585/0.0395/0.021/0.021/0.021/0.021/0.0203/0.0193
chr6.158492660.158492660	chr6	158492660	158492660	SYNJ2	0	-0.0125	6.158492660.C.T	0.9998
chr6.160575837.160575837	chr6	160575837	160575837	SLC22A1	0	-0.0109	6.160575837.G.A	0.9986
chr6.160469149.160469149	chr6	160469149	160469149	IGF2R	0	-0.0093	6.160469149.G.A	0.9409
chr6.168124453.168145089	chr6	168124453	168145089	C6orf123	40128	-0.0141	6.168136622.T.C/6.168138390.A.T/6.168137164.A.G/6.168144930.G.C/6.168145006.C.A/6.168145089.A.G/6.168124453.A.G/6.168127007.T.G	0.4704/0.1533/0.106/0.0603/0.0496/0.0422/0.0327/0.0213
chr6.168128175.168128175	chr6	168128175	168128175	C6orf123	57041	0.0168	6.168128175.A.G	0.9956
chr7.1019249.1029549	chr7	1019249	1029549	CYP2W1	0	-0.0165	7.1028448.C.T/7.1019536.G.A/7.1019249.G.A/7.1029549.T.C/7.1023617.C.A/7.1022728.T.C	0.3422/0.2348/0.2074/0.0755/0.0723/0.0344
chr7.1386960.1515133	chr7	1386960	1515133	INTS1	0	0.0123	7.1386960.C.T/7.1515133.A.C/7.1456852.G.A/7.1443245.G.A/7.1449458.C.T/7.1457341.G.A	0.7177/0.0849/0.068/0.0189/0.0148/0.0114
chr7.26008233.26022414	chr7	26008233	26022414	NFE2L3	169446	0.0248	7.26008233.T.C/7.26022414.A.C	0.7522/0.2478
chr7.26936046.27053877	chr7	26936046	27053877	SKAP2	0	-0.0103	7.27053877.A.C/7.26936046.G.A	0.8446/0.0961
chr7.28180099.28248966	chr7	28180099	28248966	JAZF1	0	0.0113	7.28185426.C.T/7.28185592.C.T/7.28188995.A.G/7.28194261.T.A/7.28191793.T.C/7.28192375.C.T/7.28183448.T.C/7.28180099.C.T/7.28203525.T.C/7.28203571.C.T/7.28248461.A.T/7.28248738.A.G/7.28248966.G.T/7.28245895.G.A	0.175/0.1474/0.1228/0.0705/0.0678/0.057/0.0457/0.0356/0.0274/0.0264/0.0161/0.014/0.0121/0.0107
chr7.28594922.28602778	chr7	28594922	28602778	CREB5	0	0.0109	7.28594922.A.G/7.28599192.C.CA/7.28602778.T.G/7.28596151.T.C	0.3112/0.2564/0.2233/0.1911
chr7.28946965.28946965	chr7	28946965	28946965	CREB5	81454	0.0138	7.28946965.A.G	0.999
chr7.28952310.28964225	chr7	28952310	28964225	CPVL	70622	-0.0103	7.28964225.C.G/7.28952310.AT.A	0.8858/0.0926
chr7.72846741.72846741	chr7	72846741	72846741	FZD9	1367	0.0734	7.72846741.C.CTTT	1
chr7.72856269.72907459	chr7	72856269	72907459	BAZ1B	0	-0.0646	7.72869866.C.CT/7.72881807.C.T/7.72907459.C.T/7.72864869.A.G/7.72896395.A.C/7.72893403.A.G/7.72877166.T.C/7.72856269.G.A/7.72873420.A.G/7.72895946.T.C/7.72870207.A.G/7.72866616.A.T	0.2167/0.1481/0.1375/0.132/0.098/0.0471/0.0387/0.0385/0.0374/0.0274/0.0242/0.017
chr7.73020337.73026151	chr7	73020337	73026151	MLXIPL	0	-0.0432	7.73026151.A.T/7.73020337.C.G/7.73025975.A.G/7.73022746.G.A	0.4324/0.2695/0.2357/0.0318
chr7.73360616.74096144	chr7	73360616	74096144	GTF2I	0	-0.01	7.73866009.A.T/7.73865553.A.G/7.73609974.G.T/7.73893563.G.A/7.73864698.T.G/7.74096144.G.A/7.73811948.T.G/7.73441356.C.G/7.73482621.G.A/7.73648032.G.C/7.73646126.C.T/7.73537902.T.C/7.73380493.T.C/7.73566677.G.A/7.73434106.G.A/7.73548451.C.T/7.73870591.G.A/7.73360616.C.G/7.73660544.T.TAAATAC/7.73544591.G.A/7.73605165.C.T	0.2248/0.1262/0.0984/0.0628/0.0511/0.0473/0.0469/0.0401/0.0393/0.0309/0.0299/0.0188/0.0181/0.0171/0.0165/0.0156/0.0156/0.0145/0.0126/0.0108/0.0106
chr7.74063883.74099677	chr7	74063883	74099677	GTF2I	0	0.0092	7.74076493.A.G/7.74065589.A.G/7.74099677.A.C/7.74086247.G.A/7.74086493.G.A/7.74063883.G.C/7.74077883.T.C	0.3306/0.2304/0.1531/0.048/0.041/0.0105/0.0105
chr7.81678311.81678311	chr7	81678311	81678311	CACNA2D1	0	0.0095	7.81678311.G.A	0.9486
chr7.84752570.85121577	chr7	84752570	85121577	SEMA3D	0	-0.0099	7.84752570.C.A/7.85121577.T.A/7.85108672.C.T	0.8829/0.0435/0.0345
chr7.92408370.92408370	chr7	92408370	92408370	CDK6	0	0.0136	7.92408370.C.T	1
chr7.93520008.93520008	chr7	93520008	93520008	TFPI2	0	-0.0092	7.93520008.G.T	0.9697
chr7.100850048.100899191	chr7	100850048	100899191	FIS1	0	0.0091	7.100881429.C.T/7.100881640.A.G/7.100873835.A.G/7.100865847.T.C/7.100850659.A.G/7.100877456.T.C/7.100850048.A.G/7.100862264.T.C/7.100872194.T.C/7.100862392.A.G/7.100851565.A.G/7.100899191.G.T	0.1451/0.1369/0.1256/0.105/0.0839/0.0614/0.0611/0.0602/0.059/0.0503/0.0452/0.0188
chr7.116417848.116438511	chr7	116417848	116438511	MET	0	-0.02	7.116437606.G.A/7.116438511.G.T/7.116417848.G.C	0.618/0.2759/0.0626
chr7.134552202.134576840	chr7	134552202	134576840	CALD1	0	0.0125	7.134576840.A.G/7.134552202.G.A/7.134555658.G.A/7.134558806.C.T/7.134552634.G.A/7.134559380.A.G/7.134561819.T.C	0.4906/0.1689/0.0737/0.0705/0.0698/0.0419/0.0355
chr7.135051453.135227513	chr7	135051453	135227513	CNOT4	0	0.0118	7.135221170.C.T/7.135061329.C.T/7.135051453.G.A/7.135053462.A.G/7.135088308.A.C/7.135073047.T.C/7.135142120.T.C/7.135215192.C.CCCTTATTTA/7.135144662.T.C/7.135093445.C.T/7.135225156.T.C/7.135100476.C.T/7.135115138.G.A/7.135064882.A.C/7.135099649.C.T/7.135210628.A.G/7.135227513.G.A/7.135216807.C.G/7.135082751.T.C/7.135051979.C.T/7.135119417.A.G	0.4084/0.0713/0.0541/0.0467/0.0357/0.0298/0.0229/0.0218/0.0195/0.0193/0.0167/0.0159/0.0156/0.0155/0.0154/0.0139/0.0138/0.0121/0.0116/0.0113/0.0104
chr7.143092269.143092786	chr7	143092269	143092786	EPHA1	0	0.0166	7.143092786.C.T/7.143092269.G.A	0.9014/0.0938
chr7.150755173.150787450	chr7	150755173	150787450	AGAP3	0	0.0102	7.150755205.G.C/7.150755173.T.G/7.150784824.G.T/7.150764388.G.T/7.150784513.C.T/7.150784407.T.C/7.150755839.C.T/7.150782617.G.A/7.150785321.C.T/7.150758482.A.G/7.150761314.G.A/7.150782071.C.T/7.150761880.C.A/7.150773566.C.A/7.150787450.T.G/7.150785012.G.A	0.2347/0.1257/0.102/0.0993/0.0695/0.0684/0.0551/0.04/0.0296/0.0281/0.0209/0.0184/0.0171/0.0153/0.0144/0.0129
chr8.8560536.8560536	chr8	8560536	8560536	CLDN23	0	-0.0118	8.8560536.G.A	0.9994
chr8.8168394.8216986	chr8	8168394	8216986	SGK223	0	0.0125	8.8206753.A.G/8.8168394.G.A/8.8216986.A.G/8.8172737.T.C/8.8172442.G.A/8.8171595.A.G	0.4206/0.3645/0.0544/0.0463/0.0148/0.0108
chr8.9183358.9184231	chr8	9183358	9184231	RP11-10A14.4	157713	0.0191	8.9184231.G.A/8.9183358.A.G/8.9183664.A.G/8.9183596.A.G	0.3363/0.2696/0.203/0.1886
chr8.10571491.10571491	chr8	10571491	10571491	RP1L1	1794	-0.0181	8.10571491.C.A	0.9677
chr8.18272377.18273300	chr8	18272377	18273300	NAT2	13650	-0.0114	8.18272635.T.C/8.18272535.C.T/8.18272881.G.A/8.18272503.C.CCATGAGCTGCCTG/8.18272377.C.T/8.18272466.G.A/8.18272438.C.T/8.18273300.G.C	0.1856/0.1692/0.1458/0.1365/0.1217/0.1214/0.0614/0.0532
chr8.21918089.21940818	chr8	21918089	21940818	DMTN	0	0.0246	8.21920052.T.C/8.21918089.A.C/8.21934681.A.C/8.21934769.C.G/8.21932281.C.T/8.21931487.A.T/8.21937441.G.A/8.21940818.G.A/8.21937870.G.A/8.21931661.A.G	0.627/0.1359/0.0473/0.0386/0.0305/0.0187/0.0175/0.0172/0.0137/0.0102
chr8.27152536.27184695	chr8	27152536	27184695	PTK2B	0	-0.0102	8.27163846.C.CT/8.27168030.G.A/8.27168902.G.A/8.27168914.G.A/8.27173037.C.G/8.27164449.G.A/8.27175308.C.T/8.27157307.C.T/8.27164146.T.C/8.27174053.T.C/8.27174861.G.T/8.27158523.T.A/8.27161678.G.A/8.27160602.T.C/8.27163515.G.A/8.27160970.A.G/8.27159836.G.A/8.27161233.A.G/8.27184695.G.A/8.27152536.T.C	0.296/0.0644/0.0578/0.0567/0.0548/0.0508/0.0471/0.044/0.0436/0.0419/0.0326/0.0324/0.02/0.02/0.0196/0.0194/0.0167/0.0163/0.0157/0.0155
chr8.55422424.55441799	chr8	55422424	55441799	SOX17	48977	0.0222	8.55422440.C.T/8.55440068.C.T/8.55437524.A.G/8.55441799.A.G/8.55436793.G.A/8.55422424.C.T	0.315/0.1785/0.1742/0.1728/0.0561/0.0556
chr8.59311697.59398461	chr8	59311697	59398461	UBXN2B	0	-0.0158	8.59393273.A.G/8.59392324.G.A/8.59392737.C.T/8.59311697.A.G/8.59338856.G.C/8.59325595.C.G/8.59339279.T.C/8.59331282.T.G/8.59336556.C.T/8.59332694.G.A/8.59347184.A.G/8.59339925.A.G/8.59340103.A.C/8.59353534.C.T/8.59327730.T.C/8.59398461.G.A	0.2031/0.1328/0.1193/0.082/0.0795/0.0748/0.0348/0.0326/0.0313/0.029/0.0279/0.0275/0.0255/0.0228/0.0222/0.0192
chr8.76465909.76465909	chr8	76465909	76465909	HNF4G	0	-0.0113	8.76465909.C.T	0.9735
chr8.120098627.120197015	chr8	120098627	120197015	MAL2	0	0.0141	8.120128070.T.C/8.120134866.T.G/8.120098627.G.GT/8.120189822.G.A/8.120189729.A.G/8.120187687.G.T/8.120188535.C.T/8.120188608.G.A/8.120188617.T.C/8.120188880.T.C/8.120189693.G.A/8.120190284.A.G/8.120189392.T.C/8.120189690.A.G/8.120188188.A.G/8.120194297.C.T/8.120187926.C.T/8.120187928.G.T/8.120197015.G.C	0.3867/0.2022/0.0487/0.0297/0.0274/0.0263/0.0253/0.0226/0.022/0.0207/0.0188/0.0185/0.0183/0.0172/0.017/0.0164/0.0143/0.0139/0.0103
chr8.126476379.126490972	chr8	126476379	126490972	TRIB1	25733	-0.0276	8.126485294.T.A/8.126481747.A.G/8.126485337.A.G/8.126480088.G.A/8.126478745.A.G/8.126490972.A.T/8.126479315.G.A/8.126478350.A.C/8.126477476.T.C/8.126480700.A.G/8.126476379.C.G	0.3953/0.2001/0.1515/0.0529/0.0398/0.0309/0.0247/0.0236/0.0145/0.0118/0.0112
chr8.145031968.145076529	chr8	145031968	145076529	GRINA	0	0.0086	8.145043543.A.G/8.145058986.A.G/8.145046662.C.T/8.145040856.G.T/8.145044104.C.T/8.145063412.T.C/8.145069806.G.A/8.145048666.T.G/8.145050358.G.A/8.145069534.C.T/8.145031968.C.T/8.145075703.C.T/8.145076529.C.A/8.145051414.G.A	0.3198/0.1948/0.071/0.0427/0.0266/0.0237/0.0236/0.0213/0.0193/0.0191/0.018/0.0157/0.0156/0.014
chr9.4127906.4143674	chr9	4127906	4143674	GLIS3	0	-0.0108	9.4131657.A.G/9.4133945.T.C/9.4129895.C.T/9.4129503.T.A/9.4129917.C.T/9.4127906.G.A/9.4129262.C.G/9.4128480.T.C/9.4131579.T.TG/9.4143674.T.G	0.2045/0.1433/0.1221/0.1158/0.1112/0.1063/0.0962/0.017/0.0167/0.0165
chr9.4282942.4305064	chr9	4282942	4305064	GLIS3	0	-0.0091	9.4291928.A.C/9.4305064.A.C/9.4294707.T.TG/9.4292083.G.A/9.4298589.G.A/9.4290541.C.A/9.4290823.A.T/9.4295583.A.G/9.4283137.G.T/9.4293150.A.C/9.4282942.T.G/9.4290544.T.C	0.304/0.2261/0.1239/0.0623/0.0396/0.0363/0.0312/0.027/0.0217/0.0216/0.0194/0.0181
chr9.14292104.14292567	chr9	14292104	14292567	NFIB	0	0.0121	9.14292567.G.A/9.14292138.G.A/9.14292104.T.C/9.14292207.G.A	0.5526/0.1734/0.142/0.0986
chr9.33646299.34130435	chr9	33646299	34130435	DCAF12	0	0.0083	9.34107505.C.T/9.33730753.A.T/9.33646299.G.T/9.34130435.G.A/9.34116083.T.C/9.33770770.G.T/9.33735912.C.T/9.34111002.G.A	0.4326/0.2414/0.0565/0.0498/0.0442/0.0387/0.0318/0.0208
chr9.92247909.92267239	chr9	92247909	92267239	GADD45G	26440	0.0106	9.92265097.A.T/9.92267239.T.C/9.92247909.G.A	0.903/0.0255/0.0156
chr9.119701541.119756132	chr9	119701541	119756132	ASTN2	0	0.0094	9.119721744.G.C/9.119701541.G.C/9.119753179.G.T/9.119753187.C.G/9.119716937.A.G/9.119711291.A.C/9.119756132.G.GATAT/9.119711249.T.C/9.119712333.C.A/9.119710771.A.C/9.119710820.T.C/9.119711698.C.CCTCT	0.1767/0.158/0.0883/0.0814/0.077/0.0641/0.061/0.0591/0.0418/0.0399/0.038/0.0144
chr9.131465481.131468740	chr9	131465481	131468740	PKN3	0	-0.023	9.131465481.C.G/9.131466489.G.T/9.131468740.G.A	0.7034/0.2032/0.0873
chr9.136149399.136155000	chr9	136149399	136155000	SURF6	42552	0.0268	9.136155000.C.T/9.136149711.A.T/9.136149399.G.A/9.136149830.G.A	0.6884/0.1059/0.0845/0.0825
chr9.136707730.136726039	chr9	136707730	136726039	VAV2	0	-0.0095	9.136721563.C.T/9.136721593.C.T/9.136722011.C.T/9.136721741.T.C/9.136722191.C.T/9.136721668.A.C/9.136721822.G.C/9.136707730.A.G/9.136723132.C.A/9.136722070.A.G/9.136721427.C.A/9.136726039.A.C/9.136723520.A.G	0.11/0.1098/0.1097/0.1041/0.103/0.1017/0.0976/0.0916/0.0347/0.0321/0.0245/0.0216/0.0144
chr10.11886745.11929708	chr10	11886745	11929708	PROSER2	0	0.0106	10.11898502.G.T/10.11898986.C.T/10.11889698.G.T/10.11898472.G.A/10.11886745.C.G/10.11901037.G.C/10.11902661.G.T/10.11901457.G.A/10.11900747.C.T/10.11895507.A.T/10.11904834.A.C/10.11929708.G.C/10.11895097.T.C/10.11929674.A.G/10.11901778.T.C/10.11907982.T.C/10.11909896.G.T	0.1244/0.1115/0.1014/0.0785/0.0726/0.0705/0.0575/0.0555/0.0548/0.0451/0.0404/0.0314/0.0298/0.0268/0.0149/0.0138/0.0106
chr10.21820453.21916728	chr10	21820453	21916728	MLLT10	0	0.0086	10.21821918.A.T/10.21824619.A.G/10.21824727.G.A/10.21827796.G.A/10.21830104.A.G/10.21834536.G.A/10.21829162.T.C/10.21820453.G.A/10.21821274.G.A/10.21916728.C.T	0.2454/0.2027/0.1988/0.0513/0.0475/0.041/0.024/0.016/0.015/0.0113
chr10.50307461.50313305	chr10	50307461	50313305	VSTM4	0	0.0097	10.50308841.G.GAC/10.50311341.A.G/10.50307461.C.T/10.50312567.T.A/10.50308187.C.T/10.50313305.C.A/10.50309330.T.C/10.50307476.A.G	0.4711/0.1143/0.0818/0.0706/0.0693/0.0606/0.0507/0.0397
chr10.52642516.52642516	chr10	52642516	52642516	A1CF	0	0.0181	10.52642516.G.T	1
chr10.52573772.52573772	chr10	52573772	52573772	A1CF	0	0.0154	10.52573772.C.T	0.9996
chr10.52637925.52644319	chr10	52637925	52644319	A1CF	0	-0.0162	10.52642384.A.G/10.52639657.G.C/10.52643179.C.T/10.52643221.T.C/10.52643078.A.G/10.52644319.A.T/10.52637925.A.G	0.1849/0.1772/0.1523/0.1521/0.1219/0.12/0.0673
chr10.52642500.52642500	chr10	52642500	52642500	A1CF	0	0.018	10.52642500.C.T	0.9978
chr10.74847525.74900121	chr10	74847525	74900121	ECD	0	-0.0106	10.74847525.C.T/10.74900121.C.T/10.74875788.C.T	0.6749/0.1574/0.1279
chr10.79680434.79680434	chr10	79680434	79680434	DLG5	0	0.0423	10.79680434.A.T	0.9816
chr10.79670434.79679689	chr10	79670434	79679689	DLG5	0	0.023	10.79670434.C.G/10.79670537.C.T/10.79670654.T.C/10.79678300.T.C/10.79673890.A.ACTC/10.79679689.T.G/10.79674287.T.C/10.79678127.A.G/10.79673480.G.A	0.2854/0.1927/0.1712/0.1235/0.1058/0.0255/0.0146/0.014/0.0116
chr10.79552092.79645070	chr10	79552092	79645070	AL391421.1	0	0.0109	10.79588209.C.T/10.79590685.C.T/10.79566365.T.G/10.79552092.C.T/10.79594754.T.TCACCAC/10.79594796.A.T/10.79617385.T.G/10.79617511.C.G/10.79625795.T.C/10.79625947.G.A/10.79625482.C.T/10.79619402.A.G/10.79617648.G.A/10.79645070.C.A/10.79603688.T.C/10.79596675.A.G/10.79623378.C.G/10.79637991.T.C/10.79637709.C.T/10.79633807.G.A	0.2156/0.2135/0.1212/0.0667/0.048/0.0252/0.0187/0.0178/0.0178/0.0178/0.0159/0.0155/0.0148/0.0132/0.0124/0.0119/0.0118/0.0118/0.0115/0.0108
chr10.81152127.81164521	chr10	81152127	81164521	ZCCHC24	0	0.0095	10.81152268.G.A/10.81164521.C.T/10.81152127.G.A/10.81162189.G.A/10.81164169.C.A/10.81163642.G.C/10.81161238.C.T	0.4777/0.2247/0.1354/0.0167/0.016/0.0155/0.0119
chr10.81094125.81099082	chr10	81094125	81099082	PPIF	8143	0.0085	10.81096589.G.A/10.81096071.T.C/10.81094125.A.G/10.81097266.A.G/10.81097759.C.T/10.81099082.G.T/10.81097499.C.A	0.2097/0.1836/0.165/0.1192/0.0909/0.0843/0.0654
chr10.94839642.94839724	chr10	94839642	94839724	CYP26A1	1996	-0.0193	10.94839724.G.T/10.94839642.G.A	0.5283/0.4717
chr10.94778869.94831781	chr10	94778869	94831781	CYP26C1	0	0.0109	10.94831781.C.T/10.94778869.T.G/10.94784905.T.G	0.7376/0.1318/0.1196
chr10.95316950.95333063	chr10	95316950	95333063	FFAR4	0	-0.013	10.95328816.A.T/10.95333063.A.G/10.95316950.TG.T/10.95320440.T.C/10.95319511.T.C/10.95324503.C.A	0.4984/0.3102/0.0662/0.0449/0.0285/0.0241
chr10.96098093.96126951	chr10	96098093	96126951	NOC3L	0	0.0094	10.96104665.T.G/10.96114835.G.A/10.96098093.T.G/10.96126951.G.A	0.429/0.4144/0.0186/0.0155
chr10.98460581.98473098	chr10	98460581	98473098	PIK3AP1	0	0.012	10.98469693.C.T/10.98470886.C.G/10.98460581.G.A/10.98470341.A.C/10.98470371.T.C/10.98470865.T.C/10.98471805.C.T/10.98469854.G.A/10.98466282.T.A/10.98473098.C.CA	0.5585/0.0746/0.063/0.0521/0.051/0.0453/0.0384/0.0315/0.0256/0.0219
chr10.98998195.99099021	chr10	98998195	99099021	FRAT2	0	0.0108	10.99094083.C.T/10.99094436.G.A/10.99099021.C.T/10.98998195.G.A/10.99086632.A.G	0.359/0.2852/0.1767/0.014/0.0121
chr10.101912064.102037393	chr10	101912064	102037393	BLOC1S2	0	-0.0123	10.101912064.T.C/10.101924418.T.C/10.101953705.A.C/10.101912194.C.T/10.102027407.C.T/10.102026559.G.C/10.101998414.T.C/10.101996360.C.T/10.101983816.G.A/10.101987467.T.C/10.101983413.G.A/10.102000701.C.T/10.101999746.G.A/10.101967410.G.A/10.101976501.G.C/10.101981153.C.T/10.102036074.G.A/10.102036684.C.G/10.102003906.G.C/10.102024258.C.T/10.102037393.A.G	0.4465/0.0473/0.0424/0.04/0.0389/0.0347/0.0292/0.0285/0.0282/0.0238/0.0236/0.0221/0.0201/0.0201/0.0182/0.0173/0.0154/0.0148/0.0144/0.0132/0.0128
chr10.102740060.102740060	chr10	102740060	102740060	SEMA4G	0	-0.012	10.102740060.C.T	0.9995
chr10.123272296.123278914	chr10	123272296	123278914	FGFR2	0	-0.0137	10.123272296.G.A/10.123278914.G.T	0.9182/0.0813
chr10.126320902.126479989	chr10	126320902	126479989	METTL10	0	-0.0138	10.126320902.C.T/10.126341780.G.GGA/10.126328689.A.G/10.126358762.CCTGA.C/10.126323279.C.T/10.126324077.G.A/10.126479989.C.G/10.126323766.A.G/10.126382431.G.C/10.126358833.C.T/10.126358413.G.A/10.126371957.C.T/10.126324209.G.A/10.126348761.T.C/10.126358174.T.C/10.126347688.T.C	0.5473/0.0923/0.0669/0.023/0.0213/0.0187/0.0174/0.017/0.0163/0.0163/0.0163/0.0162/0.0162/0.0144/0.0143/0.0106
chr11.557989.618998	chr11	557989	618998	CDHR5	0	-0.0114	11.565129.C.T/11.557989.C.T/11.572840.G.C/11.573554.A.G/11.570889.T.C/11.571316.T.A/11.560871.G.T/11.618998.G.A/11.572828.C.G/11.617537.C.T/11.570072.T.C/11.584112.G.A	0.4194/0.1113/0.0948/0.0811/0.0692/0.0515/0.0263/0.0231/0.0181/0.0135/0.0112/0.01
chr11.6955613.6955613	chr11	6955613	6955613	ZNF215	0	0.0096	11.6955613.T.C	0.9595
chr11.10522978.10560349	chr11	10522978	10560349	RNF141	0	-0.0087	11.10525795.G.T/11.10526826.TG.T/11.10536116.A.G/11.10537721.G.A/11.10545404.G.A/11.10545880.T.C/11.10557883.G.T/11.10552751.G.A/11.10551106.T.C/11.10552022.G.C/11.10557508.C.A/11.10554630.C.T/11.10547174.G.C/11.10552790.C.T/11.10549473.G.A/11.10549468.C.G/11.10553672.C.T/11.10560349.C.T/11.10522978.G.T/11.10533952.T.C/11.10545713.G.A/11.10556441.A.T/11.10533153.G.C	0.2412/0.1132/0.0644/0.0535/0.0344/0.0316/0.0296/0.0271/0.027/0.027/0.027/0.0267/0.026/0.026/0.0257/0.0247/0.022/0.0176/0.0163/0.0157/0.0127/0.0122/0.0101
chr11.12072213.12072213	chr11	12072213	12072213	DKK3	40897	-0.024	11.12072213.C.G	0.9986
chr11.19782861.19797631	chr11	19782861	19797631	NAV2	0	0.0093	11.19794015.A.G/11.19797631.A.C/11.19787053.C.A/11.19788691.T.C/11.19788288.A.T/11.19788568.C.T/11.19790494.T.C/11.19791204.G.C/11.19795319.G.T/11.19790118.T.C/11.19790170.A.G/11.19792465.G.C/11.19782861.A.G/11.19794433.T.C	0.2814/0.2157/0.0793/0.0505/0.0443/0.0405/0.0382/0.0352/0.0349/0.0328/0.0262/0.0245/0.0233/0.0212
chr11.34653771.34653771	chr11	34653771	34653771	EHF	0	-0.0165	11.34653771.T.G	0.9523
chr11.35641704.35641704	chr11	35641704	35641704	FJX1	0	0.0091	11.35641704.C.A	0.9597
chr11.47474146.47662932	chr11	47474146	47662932	MTCH2	0	0.0104	11.47532395.T.G/11.47571967.C.T/11.47600438.C.T/11.47500400.C.T/11.47560433.T.C/11.47564785.A.G/11.47563350.G.A/11.47563354.G.A/11.47509137.G.C/11.47659135.G.A/11.47530024.G.A/11.47572279.G.A/11.47568344.C.G/11.47474146.T.G/11.47573342.G.A/11.47662932.T.C	0.1588/0.1477/0.1078/0.1077/0.1011/0.0544/0.0512/0.0482/0.0292/0.0278/0.026/0.0242/0.0176/0.015/0.0148/0.0121
chr11.47587452.47889737	chr11	47587452	47889737	NUP160	0	0.0159	11.47886541.T.G/11.47746962.A.G/11.47790916.T.C/11.47797409.A.G/11.47823674.T.G/11.47889737.C.T/11.47814648.C.T/11.47587452.C.T/11.47850491.A.C/11.47727748.C.T/11.47790397.G.A	0.2388/0.123/0.1199/0.0782/0.0589/0.0562/0.0525/0.0383/0.0381/0.0194/0.0144
chr11.47512015.47512015	chr11	47512015	47512015	CELF1	0	-0.0107	11.47512015.A.C	0.9705
chr11.50132662.50378524	chr11	50132662	50378524	OR4C12	128592	-0.0098	11.50378524.C.T/11.50132662.A.T	0.8786/0.1097
chr11.55287487.56344295	chr11	55287487	56344295	OR5M10	0	-0.0086	11.56344295.T.C/11.56221932.T.C/11.56274958.C.G/11.55951802.T.C/11.55688269.G.A/11.55287487.G.C/11.56285446.G.A	0.277/0.1415/0.1413/0.1228/0.1175/0.058/0.0556
chr11.62199817.62200269	chr11	62199817	62200269	AHNAK	747	-0.0359	11.62199817.T.C/11.62200269.A.T/11.62200176.C.T	0.3999/0.3099/0.2902
chr11.62200069.62200369	chr11	62200069	62200369	AHNAK	647	-0.0198	11.62200369.A.G/11.62200069.C.T	0.8779/0.1075
chr11.65380916.65546857	chr11	65380916	65546857	AP5B1	0	0.0101	11.65380916.G.A/11.65389631.A.G/11.65389890.G.C/11.65390485.A.C/11.65546857.A.C/11.65543421.G.C	0.6844/0.097/0.0503/0.0486/0.0118/0.0106
chr11.67050292.67171736	chr11	67050292	67171736	TBC1D10C	0	0.0101	11.67138011.G.GCCCCCCACCCCCTATCCTGGCCCCCACCCC/11.67118529.A.G/11.67141483.T.C/11.67124333.T.G/11.67171736.C.T/11.67125223.T.C/11.67070766.C.T/11.67137202.T.C/11.67136981.C.T/11.67050292.G.A	0.6254/0.0242/0.0227/0.0185/0.0155/0.0153/0.0149/0.0115/0.0109/0.0104
chr11.69451864.69489417	chr11	69451864	69489417	ORAOV1	0	0.0099	11.69459036.C.G/11.69453985.A.C/11.69458430.G.C/11.69454255.T.TG/11.69454707.G.T/11.69463273.G.A/11.69453044.G.A/11.69462856.C.T/11.69452706.G.T/11.69454276.G.A/11.69451911.C.G/11.69451910.G.A/11.69463679.A.G/11.69451864.C.T/11.69456000.G.C/11.69489417.TCGGC.T	0.1463/0.1323/0.1063/0.0781/0.0681/0.0646/0.0633/0.0518/0.037/0.0354/0.0292/0.0292/0.027/0.0238/0.0202/0.0143
chr11.76281593.76299649	chr11	76281593	76299649	C11orf30	17525	-0.0101	11.76299649.C.A/11.76291154.G.A/11.76292573.A.T/11.76292575.C.T/11.76295598.G.A/11.76281593.C.T/11.76293758.G.A/11.76293726.G.T	0.5215/0.1538/0.1109/0.069/0.0442/0.018/0.0177/0.0156
chr11.78591621.78611215	chr11	78591621	78611215	TENM4	0	0.0161	11.78597949.C.G/11.78611215.C.A/11.78596973.C.A/11.78599118.T.C/11.78602525.C.A/11.78595143.T.C/11.78594649.A.T/11.78592718.C.T/11.78597112.C.G/11.78599783.A.G/11.78605436.A.G/11.78591621.T.C/11.78602747.C.G/11.78609978.T.C	0.2791/0.1066/0.077/0.0696/0.0666/0.0606/0.0582/0.058/0.0539/0.0363/0.0325/0.0296/0.0192/0.0123
chr11.78869070.78872037	chr11	78869070	78872037	TENM4	0	-0.011	11.78871554.T.C/11.78869070.G.A/11.78869645.G.A/11.78872037.C.G	0.3533/0.3365/0.2066/0.1009
chr11.78655322.78694881	chr11	78655322	78694881	TENM4	0	-0.0098	11.78659145.A.T/11.78655322.C.A/11.78658860.C.T/11.78665695.C.G/11.78656757.C.T/11.78676700.C.T/11.78658350.G.C/11.78658029.G.A/11.78660134.A.C/11.78658222.C.T/11.78666621.G.A/11.78657166.T.C/11.78655842.T.C/11.78694881.C.T/11.78657300.C.A	0.4727/0.0611/0.061/0.0498/0.042/0.0405/0.0344/0.0337/0.0331/0.0319/0.0262/0.0256/0.021/0.0163/0.0141
chr11.112966374.112970636	chr11	112966374	112970636	NCAM1	0	0.0118	11.112966374.G.A/11.112966379.C.T/11.112970636.C.T	0.4396/0.4396/0.0741
chr12.4384844.4384844	chr12	4384844	4384844	CCND2	0	-0.0109	12.4384844.T.G	0.9998
chr12.4708908.4851777	chr12	4708908	4851777	GALNT8	0	-0.0098	12.4851777.G.C/12.4720429.A.G/12.4708908.T.C/12.4793304.T.C/12.4712382.C.G	0.5562/0.1657/0.1598/0.0484/0.0439
chr12.6885076.6885076	chr12	6885076	6885076	LAG3	0	-0.0121	12.6885076.G.A	0.9986
chr12.7155536.7176204	chr12	7155536	7176204	C1S	0	0.0099	12.7155536.G.T/12.7155998.G.A/12.7165114.A.G/12.7156051.G.A/12.7170336.G.A/12.7163413.T.C/12.7162801.C.T/12.7166770.A.G/12.7176204.G.A	0.3028/0.1479/0.1305/0.1209/0.0628/0.0572/0.0258/0.0242/0.0111
chr12.11768558.11791685	chr12	11768558	11791685	ETV6	11103	0.011	12.11791685.A.G/12.11791628.G.C/12.11781035.A.G/12.11782170.T.A/12.11789527.G.A/12.11791029.C.T/12.11777911.CTG.C/12.11787922.C.T/12.11768558.C.T	0.2871/0.2484/0.2003/0.0741/0.0423/0.0321/0.0316/0.0254/0.0244
chr12.15320385.15347158	chr12	15320385	15347158	RERG	0	-0.0105	12.15332342.G.C/12.15323380.A.T/12.15321921.T.G/12.15325031.A.C/12.15321194.T.C/12.15342463.G.T/12.15322668.T.C/12.15344066.G.T/12.15330077.C.T/12.15321301.T.C/12.15323957.A.G/12.15327683.C.T/12.15342135.T.C/12.15340794.A.C/12.15327774.T.C/12.15347158.T.C/12.15346379.C.T/12.15320849.C.T/12.15320385.G.A	0.1317/0.1057/0.0916/0.0882/0.078/0.0686/0.0634/0.0472/0.0416/0.034/0.0302/0.0277/0.0256/0.0253/0.0252/0.0235/0.0214/0.0203/0.0126
chr12.20578939.20586395	chr12	20578939	20586395	PDE3A	0	-0.0111	12.20579392.G.C/12.20586395.C.T/12.20582640.A.T/12.20582651.A.G/12.20578939.C.T/12.20580725.T.A/12.20579969.G.T/12.20579575.A.C/12.20579083.A.C	0.3438/0.1841/0.095/0.0947/0.0613/0.0542/0.0492/0.0451/0.0412
chr12.20998109.21051769	chr12	20998109	21051769	SLCO1B7	0	0.0197	12.21028208.G.C/12.21049750.A.T/12.21049997.C.T/12.21049685.C.T/12.21041642.A.G/12.21038869.C.T/12.21047105.A.G/12.21046951.G.A/12.21040019.T.C/12.21040254.A.C/12.21014178.A.G/12.21038786.G.A/12.21006794.C.A/12.21007102.T.C/12.21015906.C.G/12.21025287.G.A/12.21013422.C.A/12.21025061.C.A/12.20998109.T.G/12.21022014.C.T/12.21027327.C.T/12.21051769.T.A	0.2256/0.0732/0.0657/0.0598/0.0528/0.052/0.046/0.0386/0.0359/0.0359/0.0349/0.0283/0.0265/0.0245/0.0234/0.0218/0.0209/0.0199/0.0194/0.0169/0.0162/0.0159
chr12.21326672.21329738	chr12	21326672	21329738	SLCO1B1	0	0.0122	12.21329738.A.G/12.21326672.C.A/12.21328424.G.C	0.502/0.2793/0.1912
chr12.25407726.25414408	chr12	25407726	25414408	KRAS	3857	-0.0152	12.25409070.T.C/12.25409069.A.G/12.25407726.A.G/12.25408464.A.G/12.25414408.T.A	0.3533/0.3233/0.1336/0.0813/0.0594
chr12.25193775.25204353	chr12	25193775	25204353	LRMP	0	-0.0087	12.25203702.A.G/12.25204101.T.A/12.25204353.C.T/12.25193778.A.C/12.25193775.A.G/12.25194305.C.T/12.25202646.T.C/12.25196561.T.C/12.25202330.T.C/12.25197536.T.C/12.25203478.C.A/12.25203474.C.A/12.25199496.A.G/12.25203482.C.A/12.25199646.T.C	0.207/0.1912/0.1573/0.0708/0.0707/0.0581/0.0279/0.0243/0.0237/0.0181/0.0169/0.0156/0.015/0.0147/0.0138
chr12.40501033.40675346	chr12	40501033	40675346	LRRK2	0	-0.009	12.40586295.T.A/12.40587930.T.C/12.40581331.A.T/12.40580318.T.C/12.40501033.G.C/12.40587815.T.C/12.40540636.A.T/12.40552895.C.T/12.40509341.G.A/12.40571093.C.T/12.40521896.T.C/12.40532533.A.T/12.40675346.A.G/12.40561013.C.A	0.2801/0.2059/0.0667/0.0663/0.054/0.0512/0.0223/0.0205/0.0175/0.0171/0.0163/0.0153/0.0142/0.0117
chr12.51783420.51795623	chr12	51783420	51795623	SLC4A8	0	-0.0124	12.51793821.G.A/12.51794043.A.G/12.51788340.T.C/12.51787819.C.T/12.51795623.A.G/12.51783420.T.A	0.2984/0.2323/0.1681/0.1646/0.0757/0.0208
chr12.50898728.51138862	chr12	50898728	51138862	DIP2B	0	-0.0112	12.51138862.C.T/12.50898728.G.A/12.51073523.G.A/12.51064064.A.G/12.51074873.T.A/12.51046224.G.A/12.51117593.C.A/12.51026878.T.G	0.4378/0.238/0.0561/0.053/0.0419/0.0393/0.0221/0.0111
chr12.53272228.53280221	chr12	53272228	53280221	KRT8	10756	-0.0114	12.53275709.AT.A/12.53275711.G.C/12.53277623.T.G/12.53275334.T.C/12.53274773.G.A/12.53279534.C.CA/12.53278512.T.A/12.53272532.T.C/12.53272228.T.C/12.53272920.A.G/12.53280221.C.T	0.2431/0.1059/0.1006/0.0972/0.0777/0.069/0.0689/0.0418/0.0396/0.0378/0.0282
chr12.56497903.56508409	chr12	56497903	56508409	PA2G4	0	-0.009	12.56497903.C.T/12.56508409.G.C	0.5554/0.2934
chr12.57778136.57848639	chr12	57778136	57848639	INHBE	0	-0.0107	12.57824165.G.T/12.57848639.G.A/12.57778136.C.CA/12.57803295.C.CA/12.57834911.T.G/12.57823192.C.T/12.57847938.G.A	0.6592/0.1413/0.0294/0.0156/0.0133/0.0119/0.0107
chr12.68133108.68172739	chr12	68133108	68172739	DYRK2	73923	0.0089	12.68171916.T.G/12.68166347.C.T/12.68152227.AT.A/12.68150122.A.G/12.68148870.G.T/12.68165287.C.T/12.68172739.G.A/12.68163704.C.A/12.68150174.A.G/12.68164385.C.T/12.68145081.G.A/12.68164633.T.G/12.68142496.G.GA/12.68139605.T.C/12.68133108.T.C	0.3011/0.1618/0.0834/0.0734/0.0588/0.0394/0.0393/0.0314/0.0313/0.0227/0.0208/0.0179/0.0148/0.0136/0.0109
chr12.89883302.89939095	chr12	89883302	89939095	POC1B-GALNT4	0	0.0128	12.89916811.C.T/12.89921860.A.T/12.89929953.G.A/12.89909541.C.G/12.89924755.G.T/12.89901617.G.A/12.89904052.C.A/12.89904167.C.T/12.89890784.G.GA/12.89886494.C.T/12.89904616.C.T/12.89884829.T.A/12.89897028.A.C/12.89885442.C.T/12.89883302.A.G/12.89939095.C.CAGGA	0.5784/0.0526/0.0363/0.0319/0.0316/0.0301/0.0267/0.0266/0.0244/0.024/0.0204/0.0163/0.0156/0.0128/0.0114/0.0112
chr12.95849798.95860097	chr12	95849798	95860097	METAP2	7199	-0.0139	12.95856699.G.A/12.95860097.A.T/12.95859156.C.T/12.95857690.G.A/12.95855385.C.G/12.95857620.C.T/12.95850082.C.T/12.95849798.T.G	0.1986/0.1873/0.1609/0.1029/0.0923/0.0899/0.0644/0.054
chr12.100787095.100856931	chr12	100787095	100856931	SLC17A8	0	0.0102	12.100829378.C.T/12.100827237.C.T/12.100836890.C.CT/12.100839004.C.G/12.100828086.C.T/12.100837957.C.T/12.100839254.T.C/12.100832218.G.A/12.100853603.CAAAACCCTGTCTCT.C/12.100789411.T.C/12.100856337.T.C/12.100852705.C.T/12.100787908.C.G/12.100856931.C.T/12.100789852.T.C/12.100787095.T.C	0.121/0.1136/0.1071/0.0917/0.0904/0.0867/0.082/0.0694/0.0449/0.0373/0.0294/0.0248/0.0204/0.0144/0.0142/0.013
chr12.106412705.106424666	chr12	106412705	106424666	NUAK1	32452	0.0138	12.106416386.G.A/12.106415328.C.A/12.106416283.G.A/12.106424666.G.C/12.106419959.A.G/12.106418967.T.C/12.106415466.G.A/12.106423400.A.G/12.106421503.A.G/12.106412705.A.G	0.3653/0.161/0.1214/0.093/0.0611/0.0607/0.0518/0.0186/0.0166/0.0103
chr12.109167509.109174109	chr12	109167509	109174109	SSH1	2357	-0.0172	12.109167509.A.ATGTG/12.109167803.T.C/12.109169137.T.C/12.109172875.C.CCAGA/12.109174109.A.G/12.109168440.GT.G/12.109171697.T.A	0.2834/0.1813/0.1589/0.1279/0.091/0.0765/0.0522
chr12.111515020.111522026	chr12	111515020	111522026	CUX2	0	0.0189	12.111515020.G.C/12.111522026.T.G	0.8935/0.1065
chr12.115527503.115527503	chr12	115527503	115527503	RP11-116D17.1	273313	0.0132	12.115527503.A.G	1
chr12.121423659.121424861	chr12	121423659	121424861	HNF1A	0	0.0828	12.121424406.G.A/12.121423956.C.T/12.121423659.A.G/12.121424574.G.A/12.121424861.A.G	0.318/0.245/0.1548/0.1379/0.1329
chr12.121416864.121416864	chr12	121416864	121416864	HNF1A	0	0.0292	12.121416864.C.T	1
chr12.121462139.121462139	chr12	121462139	121462139	OASL	0	-0.0127	12.121462139.G.C	0.9888
chr12.121186073.121479834	chr12	121186073	121479834	OASL	0	-0.0118	12.121186073.G.A/12.121479834.C.T	0.8342/0.1658
chr12.123188475.123209295	chr12	123188475	123209295	HCAR3	0	0.0108	12.123201726.T.C/12.123199394.C.T/12.123199392.C.A/12.123209159.C.T/12.123209295.T.A/12.123206340.T.C/12.123204419.G.T/12.123201925.G.T/12.123204297.C.T/12.123202486.C.T/12.123203986.C.T/12.123199410.G.A/12.123198921.T.G/12.123188475.G.T/12.123203258.T.G/12.123197699.T.C	0.148/0.1302/0.1302/0.071/0.0683/0.0518/0.0483/0.0476/0.0418/0.04/0.0398/0.0341/0.0334/0.0331/0.0321/0.0311
chr12.124851129.124867608	chr12	124851129	124867608	NCOR2	0	0.0134	12.124863560.A.G/12.124852564.A.G/12.124852609.T.C/12.124854903.G.A/12.124861223.A.G/12.124863195.G.C/12.124857823.T.C/12.124857274.G.A/12.124857763.G.A/12.124856660.T.A/12.124857838.T.C/12.124861864.G.A/12.124863847.T.C/12.124859135.G.A/12.124851129.T.G/12.124867608.A.G	0.2821/0.1595/0.0837/0.0801/0.051/0.0495/0.0386/0.0362/0.0305/0.0304/0.0274/0.0239/0.0233/0.0187/0.0143/0.0136
chr12.132685123.132694528	chr12	132685123	132694528	GALNT9	0	-0.0103	12.132685123.G.A/12.132694528.C.G	0.8888/0.0984
chr13.28440007.28444088	chr13	28440007	28444088	PDX1	50069	-0.0219	13.28444088.C.G/13.28441190.T.A/13.28443643.G.A/13.28440007.A.G/13.28440454.A.G	0.3217/0.2331/0.1971/0.108/0.0906
chr13.28476618.28506003	chr13	28476618	28506003	PDX1	0	0.0103	13.28501598.A.G/13.28477204.A.G/13.28478665.T.G/13.28485954.C.T/13.28477514.C.T/13.28476618.T.C/13.28506003.T.C/13.28488124.A.C/13.28491399.A.T/13.28500496.T.C/13.28491086.C.T/13.28490288.G.A/13.28483273.A.C/13.28497159.A.C/13.28494949.C.G/13.28481266.C.G/13.28480595.G.A	0.107/0.0912/0.0904/0.09/0.0816/0.0736/0.0709/0.0653/0.0549/0.0541/0.0356/0.0351/0.0266/0.0184/0.0181/0.0166/0.016
chr13.31017258.31043841	chr13	31017258	31043841	HMGB1	0	0.0121	13.31032025.A.ACCTT/13.31025521.A.G/13.31028052.A.C/13.31026830.A.T/13.31038651.G.A/13.31036642.C.G/13.31039330.G.GGCC/13.31037903.G.C/13.31033232.C.T/13.31033312.C.CTTAA/13.31023870.CAA.C/13.31043841.C.T/13.31021146.G.GA/13.31019580.C.T/13.31035467.G.GA/13.31017258.C.T/13.31042452.G.T/13.31017268.G.A	0.1868/0.176/0.1213/0.0719/0.0553/0.0504/0.0444/0.0414/0.0412/0.0318/0.0308/0.0193/0.0135/0.0132/0.0126/0.0117/0.0116/0.0104
chr13.41609047.41673457	chr13	41609047	41673457	WBP4	0	-0.0118	13.41635301.C.G/13.41609047.G.A/13.41652040.C.CA/13.41611271.A.G/13.41673457.C.G	0.734/0.0798/0.0697/0.0432/0.0308
chr13.110937565.110941393	chr13	110937565	110941393	COL4A1	0	-0.014	13.110940361.T.TGGGAGGCTGAG/13.110938824.G.A/13.110938156.A.G/13.110941207.T.C/13.110939647.G.T/13.110939664.C.T/13.110941393.A.T/13.110941243.G.A/13.110937565.G.A/13.110941316.C.T	0.5118/0.089/0.0592/0.0538/0.0512/0.0455/0.0452/0.0407/0.0344/0.031
chr13.111025118.111039070	chr13	111025118	111039070	COL4A2	0	-0.0114	13.111038395.G.A/13.111038803.A.G/13.111026734.G.A/13.111025118.A.G/13.111039070.A.G/13.111037328.G.C/13.111028978.G.A/13.111029923.G.A/13.111031180.G.A/13.111033821.C.A/13.111033704.C.T/13.111036022.G.C/13.111033125.C.T/13.111037289.A.T	0.3086/0.0946/0.0792/0.0741/0.0709/0.0674/0.0627/0.047/0.0438/0.0318/0.0243/0.0142/0.0114/0.0103
chr14.35213280.35222732	chr14	35213280	35222732	BAZ1A	0	-0.0109	14.35213280.C.G/14.35219345.A.G/14.35222372.C.T/14.35217956.T.G/14.35222242.T.A/14.35222732.C.T/14.35215683.C.T/14.35215791.G.A/14.35215564.C.T/14.35221860.A.G/14.35217037.G.A/14.35217022.G.A	0.3099/0.1676/0.0741/0.0594/0.0548/0.0508/0.0493/0.0458/0.0417/0.0411/0.0356/0.0356
chr14.50440474.50440474	chr14	50440474	50440474	C14orf182	7955	0.0162	14.50440474.A.G	0.999
chr14.89886940.89886940	chr14	89886940	89886940	FOXN3	0	0.0099	14.89886940.T.C	0.9727
chr14.94844947.94844947	chr14	94844947	94844947	SERPINA1	0	0.0125	14.94844947.C.T	0.9855
chr14.103564807.103567406	chr14	103564807	103567406	EXOC3L4	0	0.0694	14.103567290.A.G/14.103564935.C.G/14.103564807.A.C/14.103566785.C.T/14.103567406.A.AT/14.103565370.A.G	0.437/0.1471/0.1261/0.1218/0.0827/0.0424
chr14.103602278.103602278	chr14	103602278	103602278	TNFAIP2	0	-0.0225	14.103602278.A.G	0.9996
chr14.103580105.103582802	chr14	103580105	103582802	EXOC3L4	3210	0.0195	14.103580105.C.A/14.103580865.C.T/14.103582802.C.T	0.3465/0.3371/0.3097
chr14.103611336.103611336	chr14	103611336	103611336	TNFAIP2	7560	0.0153	14.103611336.A.AAAT	0.9867
chr14.103573866.103573866	chr14	103573866	103573866	EXOC3L4	0	-0.0144	14.103573866.C.T	1
chr14.103859962.103992592	chr14	103859962	103992592	CKB	0	-0.012	14.103989892.A.C/14.103992592.G.A/14.103895302.A.G/14.103859962.C.T/14.103890091.A.G/14.103943992.G.GTC/14.103959289.G.T	0.3232/0.233/0.142/0.0994/0.0634/0.0586/0.0428
chr14.103376407.103376407	chr14	103376407	103376407	TRAF3	0	-0.0156	14.103376407.C.T	1
chr14.103563421.103568729	chr14	103563421	103568729	EXOC3L4	0	0.021	14.103568729.A.G/14.103563421.G.A	0.9144/0.0497
chr14.103439994.103439994	chr14	103439994	103439994	CDC42BPB	0	-0.0417	14.103439994.C.G	1
chr14.103588382.103588382	chr14	103588382	103588382	TNFAIP2	1396	0.0166	14.103588382.G.A	0.9993
chr14.103574815.103574815	chr14	103574815	103574815	EXOC3L4	0	-0.0113	14.103574815.G.A	0.968
chr14.103484784.103484784	chr14	103484784	103484784	CDC42BPB	0	0.0395	14.103484784.G.A	1
chr14.103293290.103300498	chr14	103293290	103300498	TRAF3	0	-0.0118	14.103300498.A.C/14.103293290.T.C	0.5628/0.4372
chr15.29971324.29971370	chr15	29971324	29971370	TJP1	20201	-0.0097	15.29971324.C.G/15.29971370.A.G	0.697/0.2959
chr15.40397191.40397191	chr15	40397191	40397191	BMF	0	0.0105	15.40397191.C.G	0.9949
chr15.43680031.44429868	chr15	43680031	44429868	FRMD5	0	-0.0115	15.44429868.A.T/15.43933941.T.C/15.43757184.T.C/15.43950699.A.T/15.44375924.T.C/15.44363739.G.A/15.44028047.C.T/15.44266730.G.A/15.44355362.C.G/15.43680031.G.A/15.44297617.C.T/15.43820717.C.T	0.2925/0.2226/0.1553/0.076/0.0605/0.0381/0.0358/0.018/0.0128/0.0127/0.0114/0.011
chr15.57151389.57408432	chr15	57151389	57408432	TCF12	0	0.0117	15.57297078.A.T/15.57295579.A.G/15.57408432.C.T/15.57377536.G.A/15.57378824.G.A/15.57154952.A.T/15.57151389.T.C	0.3398/0.2524/0.1071/0.103/0.0749/0.0455/0.0356
chr15.57687813.57692274	chr15	57687813	57692274	CGNL1	0	0.0109	15.57688574.T.C/15.57688828.T.C/15.57688660.A.G/15.57688532.A.G/15.57687894.G.T/15.57688040.C.T/15.57687813.A.C/15.57687814.G.A/15.57689300.G.A/15.57690742.A.G/15.57690782.G.A/15.57689890.T.C/15.57690141.A.C/15.57690270.T.C/15.57690991.C.A/15.57692274.T.C	0.131/0.1276/0.1103/0.1057/0.0868/0.0834/0.0577/0.0575/0.0303/0.0266/0.0248/0.0239/0.0212/0.0212/0.0112/0.0107
chr15.57870866.57870866	chr15	57870866	57870866	GCOM1	13239	0.0106	15.57870866.G.T	0.9852
chr15.58674308.58712973	chr15	58674308	58712973	LIPC	0	0.0099	15.58679668.G.A/15.58680184.C.T/15.58680178.T.C/15.58678720.T.C/15.58687603.T.C/15.58680643.G.T/15.58682496.G.C/15.58681533.G.GT/15.58692936.C.T/15.58692715.C.T/15.58674308.G.A/15.58693860.C.T/15.58676032.A.T/15.58684057.A.G/15.58680954.T.C/15.58683366.A.G/15.58687530.G.A/15.58712973.T.C/15.58678512.C.T/15.58705980.C.G/15.58680639.T.C/15.58680638.T.C	0.1679/0.1343/0.093/0.0784/0.0677/0.0495/0.0477/0.0394/0.0356/0.0282/0.0263/0.0224/0.0203/0.0178/0.0172/0.0129/0.0129/0.0125/0.0123/0.011/0.0107/0.0105
chr15.60883281.60883281	chr15	60883281	60883281	RORA	0	0.0442	15.60883281.C.A	0.9999
chr15.60947763.60983429	chr15	60947763	60983429	RORA	0	-0.0113	15.60947763.C.T/15.60983429.G.A	0.6349/0.3587
chr15.63789479.63795628	chr15	63789479	63795628	USP3	1165	0.0153	15.63795628.T.C/15.63791228.A.G/15.63792758.G.GT/15.63793571.A.G/15.63794279.G.T/15.63791125.G.A/15.63793238.T.G/15.63792423.A.AT/15.63791063.T.C/15.63793873.T.C/15.63792257.T.C/15.63790642.T.C/15.63789479.G.A	0.1113/0.1054/0.1024/0.0937/0.0905/0.0729/0.0688/0.0677/0.0665/0.0512/0.0465/0.0453/0.0293
chr15.63329128.63341238	chr15	63329128	63341238	TPM1	0	0.0098	15.63334688.G.C/15.63329128.A.AC/15.63340292.C.T/15.63341238.G.C	0.8171/0.0783/0.0433/0.0381
chr15.73973978.73982556	chr15	73973978	73982556	CD276	0	0.0287	15.73979507.C.T/15.73977271.A.G/15.73978337.C.T/15.73977336.A.G/15.73982556.C.T/15.73982336.C.T/15.73973978.C.T	0.3004/0.2413/0.1593/0.1348/0.061/0.053/0.0322
chr15.74328116.74329193	chr15	74328116	74329193	PML	0	0.0093	15.74328141.G.T/15.74328116.A.G/15.74329193.T.C/15.74328576.A.G/15.74329021.T.C	0.8105/0.0781/0.0241/0.021/0.0209
chr15.74750946.75025332	chr15	74750946	75025332	CYP1A1	0	-0.0094	15.75012985.T.C/15.75022463.C.G/15.75025332.C.T/15.74930402.A.G/15.74895827.A.G/15.74912328.G.A/15.74750946.T.C/15.74869438.T.C/15.74808869.C.A/15.74829821.C.T	0.2589/0.2225/0.1178/0.1124/0.092/0.0473/0.0285/0.0238/0.0208/0.0204
chr15.85455992.85488128	chr15	85455992	85488128	SLC28A1	0	-0.0099	15.85470292.G.T/15.85470125.C.G/15.85484731.C.T/15.85479376.C.T/15.85484002.C.T/15.85484715.C.T/15.85488128.G.A/15.85455992.A.T/15.85457699.G.A	0.3849/0.288/0.0585/0.0445/0.0426/0.0423/0.0354/0.029/0.0271
chr15.90685592.90705329	chr15	90685592	90705329	SEMA4B	0	0.0134	15.90705329.T.C/15.90703571.T.C/15.90701696.G.A/15.90701180.A.G/15.90701912.A.G/15.90702268.G.C/15.90685592.G.A/15.90695776.C.T	0.6247/0.1111/0.07/0.0477/0.0375/0.0342/0.022/0.0196
chr15.90637833.90669868	chr15	90637833	90669868	IDH2	0	0.0108	15.90641774.G.T/15.90638312.T.A/15.90642706.G.T/15.90642668.C.G/15.90639725.G.A/15.90637995.A.G/15.90641898.CCT.C/15.90637833.A.T/15.90641186.C.T/15.90643604.A.G/15.90647466.G.C/15.90669868.T.C	0.2086/0.1281/0.1196/0.1123/0.0693/0.0687/0.0672/0.0622/0.0459/0.0313/0.0166/0.0102
chr15.91403674.91429287	chr15	91403674	91429287	FES	0	0.0104	15.91404705.G.A/15.91418394.C.T/15.91425232.C.T/15.91420940.C.G/15.91420973.T.C/15.91404788.T.C/15.91403674.A.G/15.91427612.G.A/15.91407275.A.C/15.91418297.T.A/15.91411656.C.T/15.91407197.T.G/15.91428521.CT.C/15.91409409.ATATAACTCATCGC.A/15.91427872.G.C/15.91429287.A.C/15.91428955.C.T	0.2385/0.1254/0.0827/0.0584/0.0515/0.0505/0.0503/0.0466/0.0417/0.0352/0.0314/0.0299/0.025/0.0238/0.0233/0.023/0.016
chr15.96704443.96714816	chr15	96704443	96714816	AC016251.1	116464	0.014	15.96714816.C.A/15.96708291.T.C/15.96704443.C.T	0.6492/0.2678/0.0472
chr15.99180105.99240947	chr15	99180105	99240947	IGF1R	0	0.0088	15.99193269.A.G/15.99196112.G.A/15.99202875.C.T/15.99204101.T.C/15.99216266.C.G/15.99193276.A.C/15.99204483.T.C/15.99190601.G.A/15.99209294.G.T/15.99180105.T.C/15.99236672.T.A/15.99183876.T.C/15.99236673.T.G/15.99240793.A.G/15.99191144.TG.T/15.99190133.C.CT/15.99240947.G.A	0.1883/0.1495/0.086/0.0601/0.0581/0.0556/0.0471/0.0428/0.0328/0.0294/0.0231/0.0215/0.0214/0.0145/0.0139/0.0133/0.0129
chr16.422516.424277	chr16	422516	424277	TMEM8A	0	0.0135	16.424277.G.A/16.422516.T.G	0.7786/0.188
chr16.2154537.2154537	chr16	2154537	2154537	PKD1	0	-0.015	16.2154537.G.A	0.9974
chr16.2153765.2201175	chr16	2153765	2201175	RAB26	0	-0.0124	16.2153765.G.A/16.2201175.T.C	0.5217/0.4727
chr16.3544040.3622653	chr16	3544040	3622653	CLUAP1	0	0.0107	16.3586230.C.T/16.3588068.A.G/16.3551799.A.C/16.3544040.G.T/16.3563566.C.G/16.3621384.C.CA/16.3622653.A.G/16.3562075.A.G	0.6018/0.1386/0.0504/0.0488/0.0351/0.0315/0.0292/0.0195
chr16.10612523.10626122	chr16	10612523	10626122	EMP2	0	-0.0099	16.10613702.A.C/16.10614364.A.G/16.10614350.C.G/16.10615370.A.G/16.10618641.C.T/16.10618314.C.T/16.10612523.G.T/16.10625383.T.C/16.10618350.C.T/16.10625376.C.T/16.10625349.A.C/16.10625427.T.C/16.10619454.T.C/16.10626122.G.C/16.10625174.T.C/16.10625258.C.T/16.10621940.G.A/16.10621890.C.G	0.2374/0.1054/0.083/0.0824/0.0722/0.0653/0.045/0.0322/0.0316/0.0292/0.0287/0.0232/0.0212/0.0207/0.0206/0.0202/0.0174/0.0164
chr16.11637085.11645013	chr16	11637085	11645013	LITAF	0	0.0178	16.11639484.C.T/16.11638461.G.A/16.11638188.G.C/16.11644842.A.G/16.11639000.G.A/16.11637357.G.T/16.11638910.C.T/16.11645013.A.T/16.11637085.T.TTTTA	0.2632/0.1562/0.1176/0.0848/0.0846/0.0781/0.0769/0.0687/0.0201
chr16.16159023.16190116	chr16	16159023	16190116	ABCC1	0	-0.0095	16.16175030.A.T/16.16183045.G.A/16.16179043.C.T/16.16182528.C.T/16.16173516.C.T/16.16162039.C.T/16.16168528.C.T/16.16159061.T.C/16.16168608.C.T/16.16190116.C.T/16.16162264.C.T/16.16159023.A.G/16.16172080.A.G/16.16171106.A.G	0.1583/0.1384/0.1368/0.1242/0.1147/0.08/0.0351/0.022/0.0188/0.0169/0.0137/0.0137/0.0107/0.0106
chr16.30536918.30546488	chr16	30536918	30546488	AC002310.13	0	0.0154	16.30536918.C.G/16.30538419.G.A/16.30546488.G.A	0.6049/0.2609/0.107
chr16.51436882.51436882	chr16	51436882	51436882	SALL1	251604	0.0177	16.51436882.A.G	0.9999
chr16.51158710.51170026	chr16	51158710	51170026	SALL1	0	0.0151	16.51170026.G.T/16.51158710.C.T/16.51165628.G.A	0.6117/0.2112/0.1771
chr16.58070964.58101942	chr16	58070964	58101942	MMP15	0	-0.021	16.58097357.A.G/16.58097600.G.C/16.58081794.C.T/16.58081989.C.G/16.58074210.A.G/16.58090400.G.C/16.58070964.T.A/16.58101942.C.A/16.58079165.G.A/16.58089377.T.A	0.3205/0.1442/0.1076/0.1075/0.0971/0.0632/0.0574/0.0305/0.0171/0.011
chr16.58075235.58084442	chr16	58075235	58084442	MMP15	0	0.0106	16.58075235.C.T/16.58084442.A.T	0.9126/0.0582
chr16.72079657.72114002	chr16	72079657	72114002	HPR	0	-0.0119	16.72105965.T.C/16.72079657.C.T/16.72114002.C.T	0.5494/0.3762/0.0681
chr16.73182252.73202875	chr16	73182252	73202875	C16orf47	3907	0.0093	16.73183440.A.G/16.73184373.G.C/16.73183339.G.A/16.73201195.A.ACT/16.73184267.T.C/16.73182252.A.G/16.73185708.G.A/16.73202875.A.C/16.73194840.G.C/16.73195849.T.G/16.73202414.C.T/16.73193684.T.C	0.2806/0.2084/0.1581/0.0501/0.0474/0.0383/0.036/0.0311/0.0282/0.0227/0.022/0.0213
chr16.80497341.80498094	chr16	80497341	80498094	DYNLRB2	76537	0.0322	16.80497601.C.A/16.80497341.G.C/16.80498094.T.C	0.6413/0.2087/0.15
chr16.80252871.80267304	chr16	80252871	80267304	DYNLRB2	307327	-0.0115	16.80255902.T.C/16.80267304.G.A/16.80252871.C.T/16.80253202.T.C	0.4635/0.4073/0.0522/0.0511
chr16.86417539.86435444	chr16	86417539	86435444	FOXF1	108689	0.0093	16.86435444.C.T/16.86432537.G.A/16.86430998.C.G/16.86434553.T.C/16.86417539.C.G/16.86433182.T.TC/16.86430852.A.G/16.86417599.G.C/16.86430254.A.G/16.86431502.G.A/16.86429940.G.C/16.86434308.G.C/16.86419360.C.G/16.86429697.T.A/16.86428394.G.C/16.86428806.G.C/16.86417890.C.T	0.1372/0.1256/0.1066/0.0779/0.065/0.0594/0.0474/0.0461/0.0454/0.0404/0.0364/0.0334/0.0288/0.0261/0.0168/0.0163/0.014
chr16.88535341.88545801	chr16	88535341	88545801	ZFPM1	0	0.0106	16.88541921.C.CG/16.88541140.C.T/16.88541097.C.G/16.88541170.T.C/16.88542984.A.G/16.88535341.G.A/16.88542695.A.C/16.88544051.C.T/16.88543480.AGT.A/16.88545801.G.C/16.88545395.G.T/16.88544822.C.G	0.2634/0.149/0.131/0.1056/0.0602/0.0537/0.0489/0.0412/0.0397/0.0228/0.0221/0.019
chr17.4686414.4690500	chr17	4686414	4690500	VMO1	0	0.0119	17.4688529.AAATAAATAAATT.A/17.4686700.A.G/17.4687041.T.C/17.4686787.G.A/17.4686814.T.C/17.4686608.G.A/17.4686825.T.C/17.4686414.A.C/17.4690296.T.C/17.4687959.T.C/17.4690500.C.G/17.4690038.C.A	0.3837/0.0714/0.0704/0.0675/0.0623/0.0619/0.0578/0.0448/0.0407/0.0404/0.0369/0.0335
chr17.4772410.5001027	chr17	4772410	5001027	ZFP3	0	0.0094	17.4772410.G.A/17.5001027.T.C/17.4805167.C.T/17.4982680.T.C/17.4802317.T.C/17.4985233.A.G/17.4805389.G.A/17.4811243.G.C/17.4806718.T.C/17.4811194.G.A	0.5194/0.0173/0.0145/0.0144/0.0134/0.0133/0.0131/0.0122/0.0109/0.0106
chr17.7296899.7456489	chr17	7296899	7456489	TNFSF12-TNFSF13	0	-0.0099	17.7456489.C.T/17.7296899.C.T	0.701/0.2585
chr17.8216468.8257981	chr17	8216468	8257981	ODF4	0	0.0111	17.8223226.C.T/17.8224276.T.C/17.8224670.G.C/17.8224133.T.C/17.8257981.A.G/17.8245103.G.GA/17.8245040.C.T/17.8240800.T.G/17.8245165.A.G/17.8216468.T.C/17.8238923.C.T/17.8230449.T.G/17.8248333.T.TTGG/17.8226880.A.G/17.8241891.A.G/17.8243785.A.G	0.2408/0.1623/0.1261/0.0444/0.037/0.034/0.03/0.0284/0.0221/0.0195/0.0188/0.0153/0.0138/0.0123/0.0112/0.0104
chr17.16945586.16977810	chr17	16945586	16977810	MPRIP	0	0.0094	17.16960911.A.G/17.16945586.T.G/17.16968251.C.T/17.16961899.A.G/17.16977810.A.C/17.16967579.A.G/17.16968670.C.T	0.406/0.2993/0.012/0.0112/0.011/0.0108/0.0107
chr17.27074489.27199481	chr17	27074489	27199481	ERAL1	0	0.0106	17.27199481.C.CT/17.27140147.A.C/17.27074565.G.C/17.27074489.G.T/17.27112215.C.CT/17.27095485.G.A/17.27105680.C.A	0.6951/0.0699/0.031/0.0306/0.0196/0.016/0.0102
chr17.30049449.30068390	chr17	30049449	30068390	COPRS	110493	-0.0104	17.30049449.C.T/17.30068390.T.C	0.6698/0.2826
chr17.36074979.36079565	chr17	36074979	36079565	HNF1B	0	0.0183	17.36074979.G.A/17.36079111.A.ATAT/17.36079565.G.A/17.36078510.G.A	0.7347/0.1046/0.0834/0.0393
chr17.36073320.36075605	chr17	36073320	36075605	HNF1B	0	-0.0088	17.36073320.C.A/17.36075605.C.T	0.8882/0.0707
chr17.37098740.37098740	chr17	37098740	37098740	FBXO47	0	-0.0112	17.37098740.A.T	0.9516
chr17.60168334.60179865	chr17	60168334	60179865	MED13	25692	0.009	17.60179724.T.C/17.60178315.G.A/17.60171223.G.A/17.60179865.G.A/17.60172573.C.T/17.60179410.G.A/17.60170075.G.C/17.60173033.G.T/17.60171809.T.G/17.60169667.G.A/17.60179116.ATGGCACCATAAGCGC.A/17.60176864.G.A/17.60177504.G.A/17.60168334.G.A/17.60177331.C.A/17.60177694.C.A/17.60174286.G.A	0.116/0.0934/0.0781/0.07/0.0674/0.0619/0.0581/0.0567/0.0534/0.0511/0.0438/0.0384/0.0368/0.0359/0.0339/0.0264/0.0222
chr17.61545779.61559625	chr17	61545779	61559625	ACE	0	-0.0107	17.61547562.G.A/17.61548476.G.A/17.61556298.C.G/17.61548918.C.T/17.61548948.C.A/17.61550729.C.A/17.61554341.C.T/17.61559625.A.G/17.61554194.T.A/17.61545779.C.T	0.2788/0.1368/0.0928/0.0881/0.0849/0.0826/0.0646/0.0515/0.05/0.0406
chr17.70074148.70084423	chr17	70074148	70084423	SOX9	32738	0.02	17.70074148.T.C/17.70079708.C.A/17.70084423.C.CT	0.7558/0.1555/0.0633
chr17.70063583.70134789	chr17	70063583	70134789	SOX9	0	-0.0097	17.70134789.A.G/17.70065629.A.T/17.70063583.C.A/17.70086552.A.G/17.70066519.G.A/17.70073990.G.T/17.70071304.A.G/17.70070358.A.T/17.70069792.A.T/17.70075038.G.A/17.70068663.T.C/17.70064856.A.G	0.5391/0.0706/0.0698/0.0594/0.04/0.0293/0.0238/0.0195/0.0194/0.0156/0.0155/0.0145
chr17.72398336.72442416	chr17	72398336	72442416	GPRC5C	0	-0.0087	17.72425159.G.A/17.72410563.G.A/17.72440591.G.A/17.72411423.T.C/17.72398518.A.G/17.72425499.A.G/17.72440847.C.T/17.72438972.C.G/17.72415606.C.G/17.72440381.G.A/17.72441342.C.T/17.72439700.T.G/17.72398336.G.A/17.72442416.A.C/17.72413953.G.A	0.2565/0.136/0.0758/0.0693/0.0562/0.0533/0.0434/0.0391/0.038/0.0305/0.023/0.0229/0.0209/0.0205/0.0198
chr17.73501752.73525670	chr17	73501752	73525670	LLGL2	0	0.0113	17.73501752.G.A/17.73525670.T.G/17.73508729.C.T/17.73512653.G.T/17.73506866.TCTTA.T/17.73511073.T.G/17.73518203.G.C	0.4448/0.3994/0.0315/0.0247/0.0219/0.0203/0.0107
chr17.75370468.75385269	chr17	75370468	75385269	"SEPT9"	0	0.018	17.75376455.C.T/17.75371822.T.C/17.75370468.T.G/17.75372339.C.T/17.75374108.T.C/17.75373200.T.C/17.75373938.A.G/17.75371267.C.T/17.75380174.G.C/17.75384691.T.C/17.75383041.A.G/17.75385269.C.T/17.75381393.A.G	0.31/0.1494/0.0958/0.0803/0.064/0.0594/0.05/0.0295/0.0278/0.0223/0.0217/0.0206/0.0198
chr17.75398498.75398498	chr17	75398498	75398498	"SEPT9"	0	-0.0101	17.75398498.C.T	0.9823
chr17.79480686.79481772	chr17	79480686	79481772	ACTG1	0	0.0298	17.79480686.T.C/17.79481772.T.C	0.5733/0.4228
chr18.745322.814730	chr18	745322	814730	YES1	0	0.0088	18.812170.G.A/18.809911.G.A/18.814730.C.G/18.793668.G.A/18.812661.G.T/18.782898.A.G/18.781379.C.T/18.745322.G.A/18.813554.G.A/18.814401.G.A/18.779237.C.T/18.767639.T.C	0.1994/0.1078/0.0959/0.0939/0.0926/0.0908/0.0902/0.023/0.0185/0.0172/0.0159/0.0144
chr18.25674859.25756765	chr18	25674859	25756765	CDH2	0	-0.0086	18.25756765.C.T/18.25692495.A.G/18.25756687.A.G/18.25690011.T.C/18.25676363.G.A/18.25682035.C.T/18.25681911.G.A/18.25736229.C.T/18.25734936.A.G/18.25674859.A.G/18.25743967.G.A/18.25684095.G.A/18.25689229.G.C	0.1194/0.1103/0.1099/0.1081/0.0709/0.0646/0.0607/0.058/0.0558/0.0551/0.0539/0.0513/0.0481
chr18.55313997.55322502	chr18	55313997	55322502	ATP8B1	0	-0.0211	18.55322502.C.T/18.55313997.C.T/18.55318487.G.A/18.55317896.G.A/18.55319032.T.C	0.5759/0.1397/0.1225/0.0652/0.0522
chr18.55419788.55435167	chr18	55419788	55435167	ATP8B1	0	0.0094	18.55419792.T.C/18.55419788.T.G/18.55424664.G.C/18.55420793.C.A/18.55424717.T.C/18.55419830.T.A/18.55424521.G.A/18.55425276.G.A/18.55425328.C.T/18.55424872.C.T/18.55419839.C.T/18.55425203.A.G/18.55435167.G.A	0.1831/0.1822/0.088/0.0791/0.0678/0.0647/0.0503/0.0452/0.0419/0.0388/0.038/0.0376/0.0367
chr18.56086820.56095378	chr18	56086820	56095378	NEDD4L	18049	-0.0468	18.56095378.T.G/18.56086820.C.T/18.56089116.A.G	0.749/0.147/0.091
chr18.56099855.56099855	chr18	56099855	56099855	NEDD4L	31083	-0.0154	18.56099855.T.C	1
chr18.56100667.56100667	chr18	56100667	56100667	NEDD4L	31895	-0.0102	18.56100667.AT.A	0.9915
chr18.60845884.60845884	chr18	60845884	60845884	BCL2	0	-0.0107	18.60845884.T.C	0.9994
chr18.60783211.60795188	chr18	60783211	60795188	BCL2	0	0.0092	18.60783211.G.A/18.60793549.C.T/18.60783729.A.G/18.60793494.C.T/18.60788745.A.G/18.60795188.C.T/18.60785638.G.A	0.2052/0.1671/0.1438/0.1394/0.1384/0.1036/0.095
chr19.807442.807442	chr19	807442	807442	PTBP1	0	0.0217	19.807442.G.C	1
chr19.5840619.5840619	chr19	5840619	5840619	FUT6	877	0.0168	19.5840619.C.T	0.9976
chr19.6675989.6675989	chr19	6675989	6675989	C3	1725	0.0122	19.6675989.A.G	0.9985
chr19.6751279.6753769	chr19	6751279	6753769	SH2D3A	0	0.0094	19.6751293.T.G/19.6751279.A.G/19.6751281.C.T/19.6752434.T.C/19.6753769.G.A	0.4613/0.2159/0.2029/0.0586/0.0535
chr19.14172728.14172951	chr19	14172728	14172951	PALM3	2758	0.0094	19.14172896.G.C/19.14172951.T.G/19.14172921.A.T/19.14172728.C.T	0.535/0.2117/0.1903/0.0288
chr19.17833856.17862131	chr19	17833856	17862131	FCHO1	0	0.0212	19.17862131.G.A/19.17843795.T.C/19.17844325.T.C/19.17839232.G.A/19.17835520.A.G/19.17836108.A.G/19.17847040.C.T/19.17844637.T.C/19.17841313.T.C/19.17833856.C.T/19.17844894.A.G	0.7286/0.0407/0.0396/0.02/0.0188/0.0186/0.0177/0.0172/0.0161/0.0146/0.0131
chr19.18214521.18223350	chr19	18214521	18223350	MAST3	0	0.0203	19.18222095.T.TC/19.18221964.A.C/19.18218899.A.G/19.18218610.A.T/19.18221213.G.A/19.18218820.G.T/19.18223350.A.G/19.18220370.AGAGT.A/19.18214521.T.C/19.18217010.A.G/19.18217277.G.C	0.1701/0.1661/0.1145/0.0987/0.0955/0.0879/0.0853/0.0585/0.0479/0.0174/0.0137
chr19.19366632.19717056	chr19	19366632	19717056	PBX4	0	0.0109	19.19366632.C.T/19.19379549.C.T/19.19702384.G.A/19.19407718.T.C/19.19393890.A.AG/19.19460541.G.C/19.19388500.A.T/19.19494483.G.A/19.19419071.G.A/19.19711139.C.T/19.19717056.A.G/19.19578743.A.G/19.19700552.C.T	0.2265/0.2023/0.0757/0.0716/0.0702/0.0549/0.041/0.0379/0.0269/0.0252/0.0222/0.0216/0.011
chr19.33887160.33887160	chr19	33887160	33887160	PEPD	0	-0.0157	19.33887160.A.C	0.9996
chr19.33517152.33519927	chr19	33517152	33519927	RHPN2	0	0.0156	19.33517515.C.T/19.33517152.G.A/19.33517201.C.T/19.33518718.A.G/19.33519927.T.G	0.5193/0.2053/0.1545/0.0662/0.035
chr19.33885318.33885318	chr19	33885318	33885318	PEPD	0	-0.0105	19.33885318.T.C	0.9901
chr19.33846869.33869800	chr19	33846869	33869800	CEBPG	0	-0.0089	19.33869800.A.G/19.33846869.A.G	0.9008/0.0672
chr19.38758471.38774664	chr19	38758471	38774664	SPINT2	0	0.0131	19.38759103.T.C/19.38758752.C.T/19.38758471.G.A/19.38774664.G.T	0.426/0.3407/0.1562/0.0337
chr19.38565085.38592251	chr19	38565085	38592251	SIPA1L3	0	-0.0122	19.38565085.T.C/19.38584372.A.G/19.38592251.G.A/19.38584197.A.G/19.38589731.A.G/19.38588045.T.A/19.38578026.T.C/19.38588864.C.T/19.38589169.A.G/19.38576657.A.C/19.38585190.T.C	0.1975/0.1335/0.0988/0.0866/0.0852/0.0668/0.0655/0.063/0.0558/0.05/0.0494
chr19.41825191.41826020	chr19	41825191	41826020	CCDC97	0	0.0194	19.41825191.C.T/19.41826020.A.C	0.5619/0.4274
chr19.45392254.45418790	chr19	45392254	45418790	APOC1	0	-0.0112	19.45411941.T.C/19.45410002.G.A/19.45415713.G.A/19.45392254.C.T/19.45406673.G.A/19.45415935.G.T/19.45417638.C.CTTCG/19.45418790.T.C/19.45416178.G.T	0.6106/0.0762/0.0551/0.0499/0.0433/0.0414/0.0303/0.0273/0.0181
chr19.45723379.45815248	chr19	45723379	45815248	CKM	0	0.0095	19.45723379.T.C/19.45755368.G.T/19.45748362.G.C/19.45742094.G.A/19.45740771.C.T/19.45741353.A.G/19.45744552.T.C/19.45744842.A.G/19.45743640.T.C/19.45741609.T.C/19.45745607.T.C/19.45745052.C.CCA/19.45742902.C.T/19.45741333.A.T/19.45786555.T.C/19.45749484.G.C/19.45742011.C.G/19.45815248.T.C/19.45766729.G.A/19.45742498.C.T	0.3558/0.0748/0.0528/0.0325/0.031/0.0284/0.0259/0.0255/0.0247/0.0236/0.023/0.0223/0.0217/0.0215/0.0213/0.0182/0.0171/0.0159/0.0151/0.0133
chr19.49219459.49232226	chr19	49219459	49232226	RASIP1	0	0.0306	19.49220323.A.G/19.49219459.T.C/19.49232226.G.A/19.49227256.C.T/19.49228272.T.C/19.49229525.T.C/19.49227043.G.A/19.49227443.C.T	0.519/0.1408/0.1383/0.0437/0.037/0.0333/0.0206/0.0192
chr19.50016479.50018248	chr19	50016479	50018248	FCGRT	0	0.0123	19.50016971.G.GTCTCTCTCTC/19.50016748.C.T/19.50016479.T.G/19.50017724.C.T/19.50018248.T.C	0.3983/0.3478/0.0884/0.0176/0.0114
chr20.3692345.3692345	chr20	3692345	3692345	SIGLEC1	4570	0.0219	20.3692345.T.C	0.9893
chr20.3681399.3686436	chr20	3681399	3686436	SIGLEC1	0	-0.0129	20.3686436.C.T/20.3682762.G.A/20.3682011.G.A/20.3681399.G.C/20.3681420.C.T/20.3682275.A.G/20.3681708.G.A	0.2984/0.144/0.1362/0.1053/0.101/0.0972/0.0806
chr20.3682126.3682657	chr20	3682126	3682657	SIGLEC1	0	0.0099	20.3682126.C.T/20.3682657.G.A	0.8527/0.143
chr20.14677571.14683029	chr20	14677571	14683029	MACROD2	0	0.0142	20.14681863.C.T/20.14681801.G.C/20.14678135.G.T/20.14677571.G.C/20.14682334.G.A/20.14677650.A.G/20.14683029.C.A	0.206/0.199/0.1982/0.1312/0.0846/0.0809/0.0757
chr20.17759862.17773410	chr20	17759862	17773410	BANF2	43347	-0.0094	20.17771604.T.C/20.17773410.T.A/20.17772188.T.C/20.17771113.A.G/20.17769414.A.G/20.17769328.G.T/20.17769716.C.CAA/20.17768159.C.T/20.17759862.C.T/20.17771915.G.A/20.17769853.G.A/20.17766250.T.C/20.17766254.G.A/20.17762075.T.C/20.17773146.G.A/20.17764651.T.G	0.1208/0.1154/0.1004/0.0907/0.0705/0.0691/0.0652/0.0629/0.0421/0.0375/0.0346/0.0339/0.0337/0.0301/0.0254/0.0207
chr20.33716263.33718706	chr20	33716263	33718706	EDEM2	0	0.0112	20.33716598.G.A/20.33716739.C.T/20.33716263.A.G/20.33718706.G.A/20.33717987.T.C	0.324/0.2711/0.1196/0.0495/0.0461
chr20.39142516.39179822	chr20	39142516	39179822	MAFB	134666	0.0098	20.39179822.G.C/20.39142516.G.A/20.39165692.G.A	0.8411/0.0886/0.0655
chr20.39143298.39195092	chr20	39143298	39195092	MAFB	119396	-0.0094	20.39158207.T.A/20.39150713.A.T/20.39162892.T.C/20.39163431.T.C/20.39143298.C.A/20.39144286.T.A/20.39147287.A.G/20.39167592.G.A/20.39189838.C.T/20.39195092.C.A/20.39194690.A.G	0.1715/0.134/0.1237/0.1182/0.0848/0.0797/0.0757/0.0704/0.0188/0.0161/0.0106
chr20.43042364.43042364	chr20	43042364	43042364	HNF4A	0	0.0111	20.43042364.C.T	1
chr20.43044362.43058096	chr20	43044362	43058096	HNF4A	0	0.0088	20.43052570.T.C/20.43050761.T.G/20.43050981.A.C/20.43051213.T.C/20.43047293.A.G/20.43046045.T.G/20.43058096.C.G/20.43053588.A.T/20.43044362.C.T/20.43048685.A.G/20.43056149.G.T/20.43050368.T.G	0.1601/0.1339/0.1006/0.0994/0.0916/0.0691/0.0599/0.0595/0.0539/0.0517/0.0338/0.028
chr20.44544947.44660699	chr20	44544947	44660699	SLC12A5	0	-0.009	20.44551855.T.C/20.44576502.T.C/20.44652392.T.C/20.44554015.T.C/20.44653107.C.G/20.44660699.T.G/20.44563007.C.T/20.44569930.C.T/20.44557615.G.C/20.44560820.C.T/20.44559748.G.T/20.44557474.T.C/20.44547068.A.G/20.44549476.T.C/20.44546197.C.A/20.44585420.A.G/20.44589970.C.T/20.44590298.C.G/20.44547672.T.C/20.44544947.T.C/20.44548301.T.C	0.1113/0.1094/0.0997/0.0945/0.0942/0.079/0.0683/0.0356/0.03/0.0298/0.0273/0.0266/0.026/0.0174/0.0151/0.0142/0.0136/0.0121/0.012/0.011/0.0107
chr20.45550489.45605548	chr20	45550489	45605548	EYA2	0	0.0094	20.45557469.A.G/20.45557065.A.G/20.45557017.A.G/20.45550489.T.G/20.45605548.A.AT	0.3244/0.2132/0.175/0.1401/0.0149
chr20.48792995.49092138	chr20	48792995	49092138	CEBPB	0	-0.0097	20.49092138.C.G/20.48893115.A.G/20.48836776.C.T/20.48792995.G.A	0.7533/0.1252/0.0356/0.0288
chr20.61342535.61373023	chr20	61342535	61373023	NTSR1	0	-0.0096	20.61342535.T.C/20.61373023.A.G/20.61359519.G.A/20.61358810.A.G/20.61359421.C.T/20.61359351.C.G/20.61359001.G.A/20.61359458.C.CACG/20.61359460.T.TG/20.61360473.C.T/20.61368295.G.C/20.61367414.T.C/20.61363722.G.A	0.5094/0.1388/0.0428/0.0382/0.0304/0.0297/0.0293/0.0277/0.0277/0.0214/0.0201/0.0181/0.0103
chr20.62330417.62372813	chr20	62330417	62372813	SLC2A4RG	0	0.0103	20.62340115.C.G/20.62367377.A.G/20.62369422.AGGGCG.A/20.62370890.A.G/20.62372813.G.A/20.62337622.A.G/20.62358580.AT.A/20.62369997.C.T/20.62364376.G.C/20.62341235.T.C/20.62364885.T.A/20.62361250.A.G/20.62363838.T.C/20.62347187.G.T/20.62350413.A.G/20.62353933.A.G/20.62354572.G.A/20.62348158.T.C/20.62352319.T.C/20.62352827.T.C/20.62330417.T.C/20.62357556.A.ATT	0.3674/0.0599/0.0579/0.0499/0.0496/0.0452/0.0393/0.039/0.0354/0.021/0.0195/0.0192/0.0175/0.0158/0.0133/0.0122/0.0115/0.0114/0.0108/0.0108/0.0106/0.0102
chr21.16582880.16592695	chr21	16582880	16592695	NRIP1	145560	0.0088	21.16583131.T.A/21.16583736.A.G/21.16583687.G.A/21.16583553.A.G/21.16582880.G.T/21.16586682.T.A/21.16592695.A.G/21.16583936.T.G/21.16592296.T.G	0.2411/0.224/0.2023/0.1402/0.0384/0.0354/0.029/0.0252/0.0161
chr21.30196904.30205143	chr21	30196904	30205143	N6AMT1	39370	0.0138	21.30196904.C.T/21.30198316.T.C/21.30205143.A.G/21.30199550.G.C/21.30202927.G.A/21.30203180.C.A/21.30203175.G.A/21.30200824.C.T/21.30203644.T.C/21.30200490.G.GT	0.1642/0.1307/0.0998/0.0941/0.0825/0.082/0.0808/0.0766/0.0634/0.0427
chr21.37354139.37362989	chr21	37354139	37362989	RUNX1	0	-0.009	21.37360869.T.C/21.37362661.A.G/21.37361496.C.T/21.37360982.A.C/21.37362989.A.G/21.37359882.C.T/21.37359958.A.T/21.37359969.T.G/21.37359768.T.C/21.37362003.T.C/21.37357478.A.G/21.37357106.C.T/21.37359231.G.A/21.37356416.G.C/21.37356710.T.C/21.37354139.G.A	0.1424/0.126/0.1253/0.1071/0.0742/0.0542/0.0514/0.0512/0.0364/0.0319/0.0269/0.0264/0.0189/0.0158/0.0155/0.0148
chr21.42882671.42882671	chr21	42882671	42882671	TMPRSS2	0	-0.0118	21.42882671.C.T	0.9957
chr21.42261734.42265286	chr21	42261734	42265286	DSCAM	42670	-0.0108	21.42265286.C.A/21.42262058.G.A/21.42261734.T.C	0.3878/0.3438/0.2361
chr21.46271452.46271452	chr21	46271452	46271452	PTTG1IP	0	-0.0176	21.46271452.C.T	0.9937
chr22.24995756.24997070	chr22	24995756	24997070	GGT1	0	0.1905	22.24995756.C.A/22.24997070.A.G	0.8261/0.1739
chr22.24931833.24943369	chr22	24931833	24943369	GUCD1	0	0.0384	22.24931833.A.G/22.24943369.C.T	0.5389/0.4583
chr22.24266726.24298325	chr22	24266726	24298325	GSTT2B	1276	-0.0331	22.24266831.G.C/22.24266954.A.C/22.24266867.G.A/22.24266726.T.C/22.24267047.C.T/22.24295286.T.C/22.24297287.T.C/22.24298325.G.A/22.24298293.A.C	0.3046/0.2457/0.2011/0.1232/0.0304/0.0191/0.0112/0.0112/0.0107
chr22.24985000.24985000	chr22	24985000	24985000	FAM211B	0	0.0281	22.24985000.C.T	1
chr22.24986145.24986145	chr22	24986145	24986145	FAM211B	0	-0.0675	22.24986145.G.A	0.9934
chr22.24918246.24958116	chr22	24918246	24958116	SNRPD3	0	0.0137	22.24918246.G.A/22.24958116.C.T/22.24932261.CAA.C	0.445/0.3997/0.1553
chr22.24997357.24997357	chr22	24997357	24997357	GGT1	0	-0.0158	22.24997357.G.A	1
chr22.24981363.24990336	chr22	24981363	24990336	FAM211B	0	-0.0139	22.24984384.G.C/22.24990336.C.T/22.24981363.C.G	0.7749/0.1136/0.1055
chr22.24709420.24790488	chr22	24709420	24790488	SPECC1L-ADORA2A	0	-0.0195	22.24790488.C.T/22.24709420.C.T	0.6845/0.3155
chr22.24985742.24985742	chr22	24985742	24985742	FAM211B	0	0.026	22.24985742.C.A	1
chr22.24548597.24548597	chr22	24548597	24548597	CABIN1	0	0.0174	22.24548597.A.G	0.9597
chr22.24977802.24977802	chr22	24977802	24977802	SNRPD3	0	0.0133	22.24977802.A.G	1
chr22.25029782.25029782	chr22	25029782	25029782	GGT1	4810	-0.0818	22.25029782.A.C	0.999
chr22.25010855.25010855	chr22	25010855	25010855	GGT1	0	-0.0493	22.25010855.A.G	1
chr22.25012940.25013346	chr22	25012940	25013346	GGT1	0	-0.0987	22.25012940.T.A/22.25013346.G.A	0.5794/0.4017
chr22.25078783.25078783	chr22	25078783	25078783	PIWIL3	36217	-0.0244	22.25078783.C.T	0.9963
chr22.25083697.25091395	chr22	25083697	25091395	PIWIL3	23606	0.0134	22.25090989.G.A/22.25090985.C.T/22.25090998.A.T/22.25089769.A.G/22.25089773.A.G/22.25091395.C.T/22.25091272.C.T/22.25090863.G.C/22.25087674.T.C/22.25087731.C.T/22.25087256.T.C/22.25089759.C.G/22.25090006.A.G/22.25089322.T.A/22.25088494.C.A/22.25088629.T.A/22.25086063.G.A/22.25089914.A.G/22.25090370.C.T/22.25090165.G.A/22.25089881.A.G/22.25090768.G.A/22.25087268.G.A/22.25083697.G.A/22.25089751.G.A	0.1794/0.1788/0.1361/0.0717/0.0522/0.0345/0.03/0.0282/0.0216/0.0216/0.0183/0.0165/0.0151/0.0137/0.0134/0.013/0.0129/0.0126/0.0124/0.0118/0.0117/0.0115/0.011/0.011/0.0109
chr22.25022713.25022713	chr22	25022713	25022713	GGT1	0	-0.0227	22.25022713.C.A	1
chr22.25001429.25001429	chr22	25001429	25001429	GGT1	0	-0.0191	22.25001429.A.T	1
chr22.25003203.25003203	chr22	25003203	25003203	GGT1	0	-0.0415	22.25003203.A.G	1
chr22.25017334.25017334	chr22	25017334	25017334	GGT1	0	-0.0247	22.25017334.G.A	1
chr22.29096361.29115066	chr22	29096361	29115066	CHEK2	0	0.0178	22.29108229.A.G/22.29101357.A.G/22.29105415.G.C/22.29115066.C.T/22.29100711.T.C/22.29107195.G.A/22.29098576.C.G/22.29096361.G.A/22.29110759.C.G/22.29105610.C.T	0.2321/0.1406/0.115/0.0942/0.0816/0.0794/0.0736/0.0686/0.0408/0.0349
chr22.38142199.38176270	chr22	38142199	38176270	TRIOBP	0	-0.0108	22.38148564.C.T/22.38148262.C.A/22.38154413.G.C/22.38142199.G.T/22.38156733.G.A/22.38151000.A.G/22.38160078.C.T/22.38165449.G.A/22.38166082.G.A/22.38176270.C.T	0.3222/0.1653/0.1564/0.0935/0.0665/0.0564/0.0323/0.0282/0.0268/0.0188
chr22.39096602.39096602	chr22	39096602	39096602	JOSD1	0	0.0213	22.39096602.T.C	0.9949
chr22.39226589.39245556	chr22	39226589	39245556	NPTXR	0	-0.0093	22.39226888.A.ACC/22.39240717.A.G/22.39231168.C.T/22.39228774.C.G/22.39227793.G.A/22.39228255.C.T/22.39226589.C.T/22.39239687.C.G/22.39241583.G.A/22.39245556.G.A/22.39240720.G.A/22.39240113.T.C/22.39236170.A.T/22.39232506.G.A/22.39238455.G.A/22.39230064.G.A/22.39241262.A.G/22.39241294.G.T/22.39238700.C.T/22.39237158.G.C/22.39237910.G.C/22.39242523.A.T	0.207/0.0552/0.0535/0.0488/0.0452/0.0436/0.0401/0.0387/0.0378/0.0314/0.0313/0.0309/0.0303/0.0297/0.0286/0.0277/0.0267/0.0267/0.0253/0.0244/0.0238/0.0236
chr22.44424108.44424192	chr22	44424108	44424192	PARVB	0	-0.0119	22.44424108.C.T/22.44424192.G.T	0.7235/0.2448
chr22.50866439.50866439	chr22	50866439	50866439	PPP6R2	0	-0.0129	22.50866439.A.G	0.962
chr22.51083118.51112361	chr22	51083118	51112361	SHANK3	482	0.0087	22.51094926.C.T/22.51095727.G.GTTTC/22.51091914.C.T/22.51096310.A.AC/22.51083118.C.A/22.51095949.T.G/22.51089716.C.G/22.51095286.C.T/22.51099671.T.C/22.51101938.A.C/22.51112361.G.A	0.2848/0.1289/0.0934/0.0848/0.0776/0.0736/0.0727/0.0599/0.0253/0.0172/0.0159
